# Supplementary material for: Extensive T cell cross-reactivity between diverse seasonal influenza strains in the ferret model
Source: PubMed Central journal article supplement (PMC5904180; doi:10.1038/s41598-018-24394-z), 2018-04-17
Supplement: 41598_2018_24394_MOESM1_ESM.pdf [file 41598_2018_24394_MOESM1_ESM.pdf]

Extensive T cell cross-reactivity between diverse seasonal influenza strains in the ferret model

Adrian J Reber, Nedzad Music, Jin Hyang Kim, Shane Gansebom, Jufu Chen, Ian York



B. HLA-II

HA

NA

NP

PB1

M1

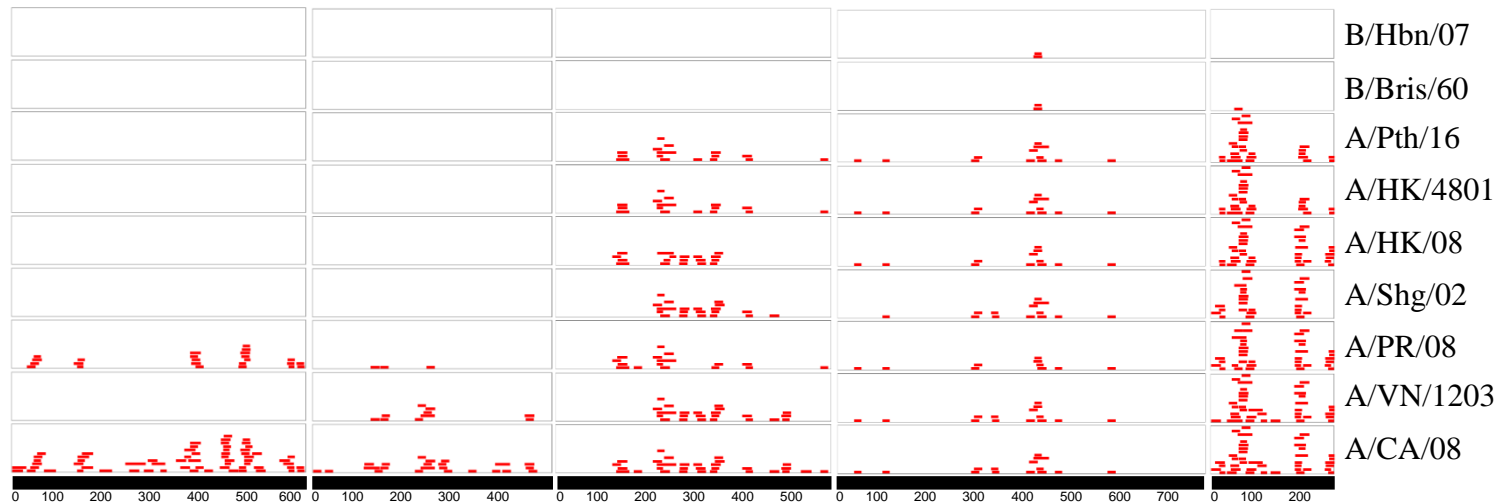

PB2

PA

NEP

NS1

M2

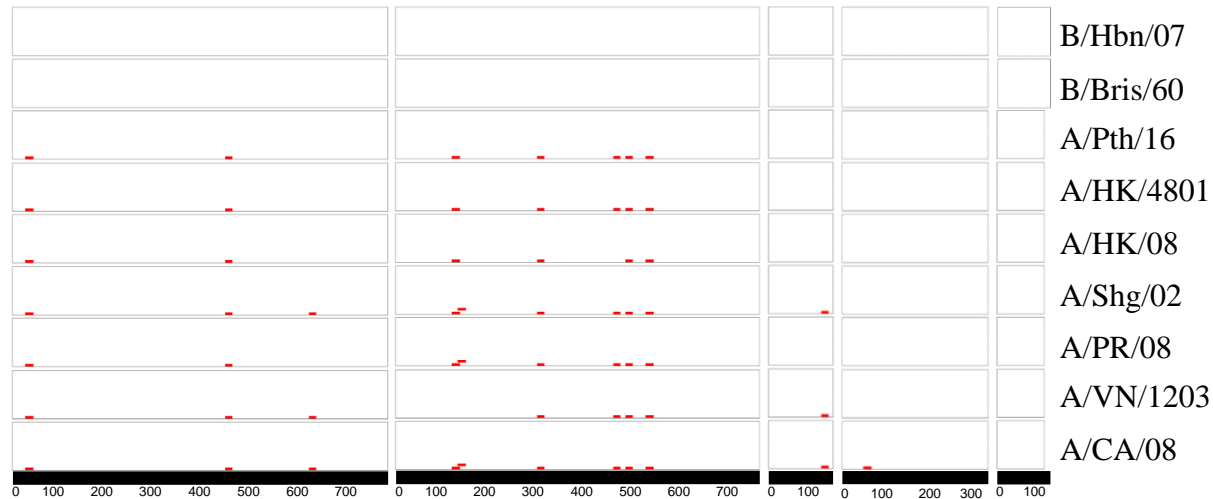

**Figure. S1. A/California/08/2009 Human Leukocyte Antigen class I and II binding epitopes cross-reactive with a diverse selection of influenza strains.** Known HLA class I (A) and HLA class II (B) binding epitopes derived from a diverse group of influenza viruses spanning both human and animal strains were downloaded from the Internet Epitope Database (IEDB: <http://www.iedb.org/>). The epitopes from the 2009 pandemic H1N1 strain, A/California/08/2009 (A/CA/08), which bound either human HLA-I or HLA-II were first determined, then cross-reactivity of those epitopes with other influenza strains assessed. For a broader comparison of potential cross-reactivity, in addition to influenza strains used within the study, comparisons to the avian influenza strains A/Shanghai/02/2013 (A/Shg/02; H7N9) and A/Vietnam/1203/2004 (A/VN/1203; H5N1) were performed as well as to the currently circulating human H3N2 strain A/Hong Kong/4801/2014 (A/HK/4801). HLA binding epitopes from each protein are depicted in red. Epitopes from the entire influenza proteome are depicted. The y-axis represents the amino acid sequence designation.

## Nasal Wash Virus Titer

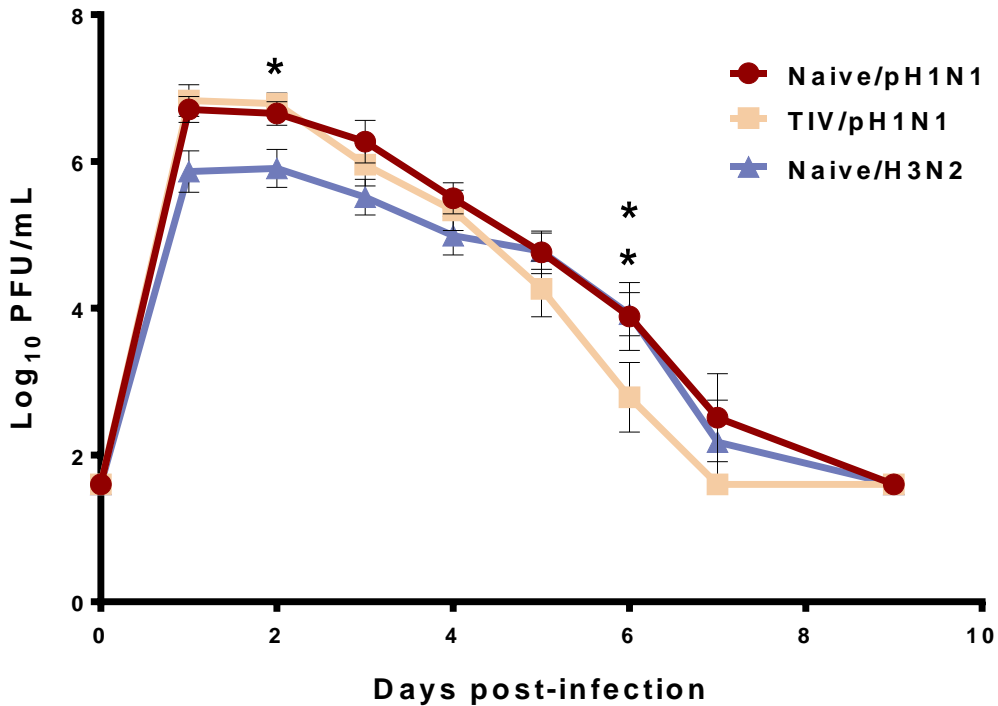

**Figure S2. Nasal Wash Titer.** Two weeks after booster vaccination, ferrets were challenged intranasally with  $10^6$  PFU of H1N1pdm09 (TIV/pH1N1). Unvaccinated ferrets were challenged intranasally with  $10^6$  PFU of H1N1pdm09 (Naive/pH1N1) or with the seasonal H3N2 strain, A/Perth/16/2009 (Naive/H3N2). Nasal washes were obtained on days 0–9 and virus titers in the nasal washes were measured. Error bars standard error of the mean (SEM). Significance is indicated by \*  $p < 0.05$ .

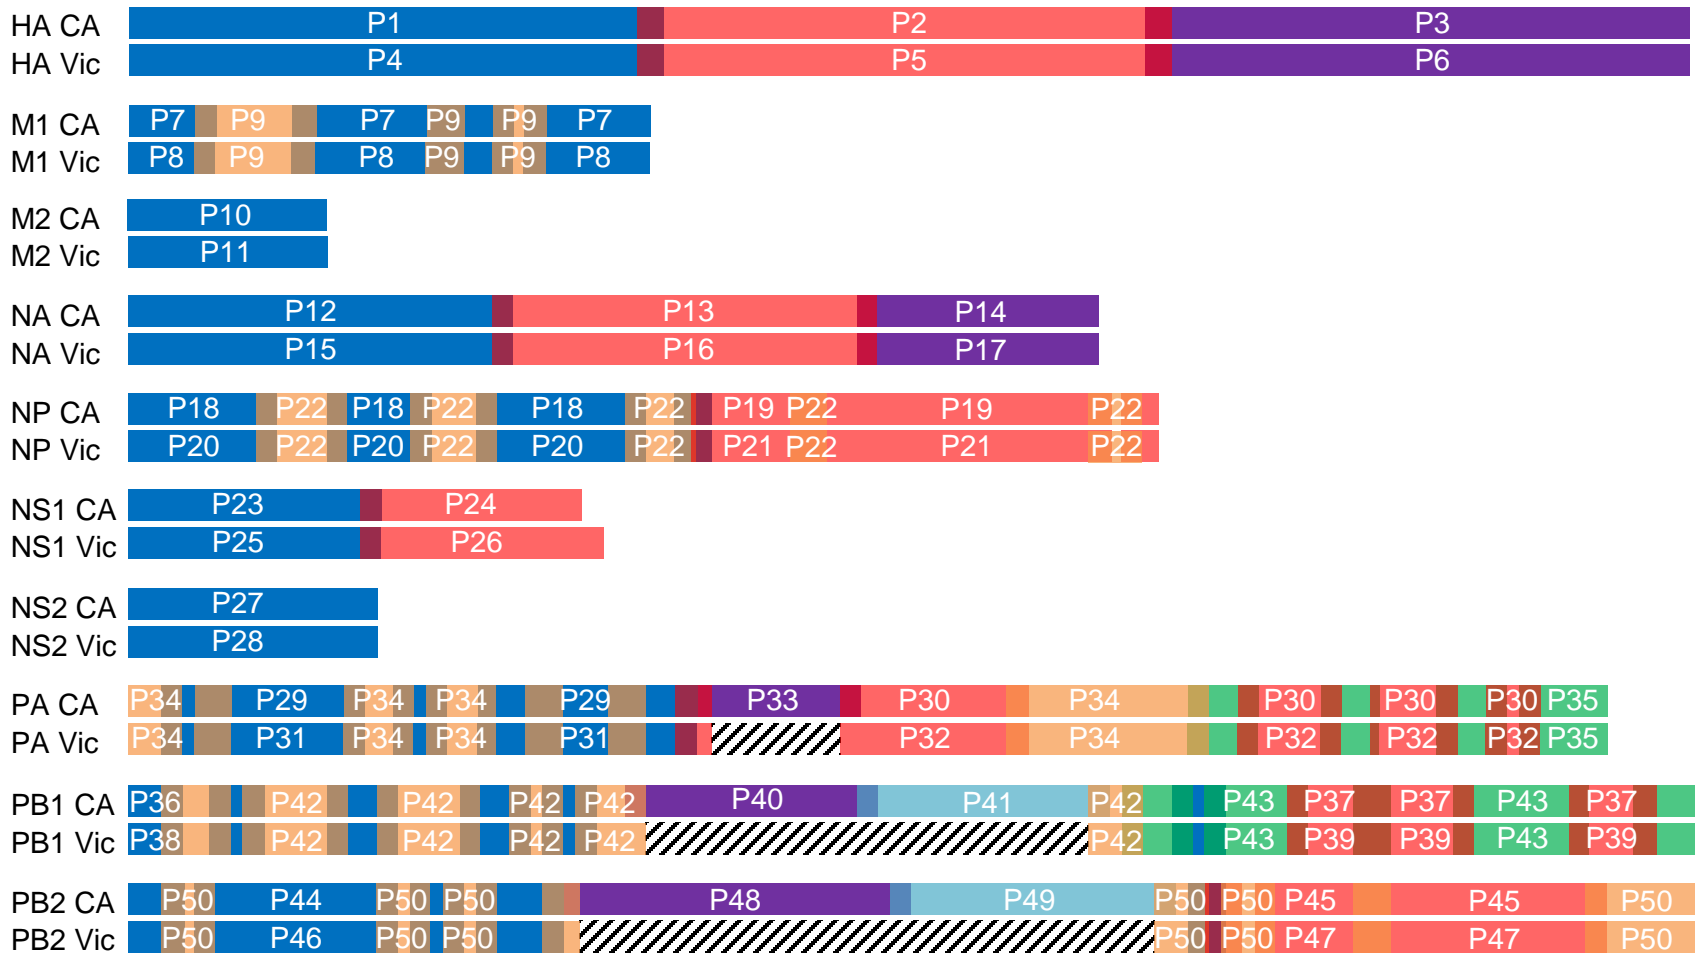

| <u>Strain</u> | <u>Protein</u> | <u>Sequence</u>     | <u>Peptide Pool</u> |
|---------------|----------------|---------------------|---------------------|
| CA07          | HA             | MKAILVLLYTFATANAD   | P1                  |
| CA07          | HA             | LYTFATANADTLCIGYHA  | P1                  |
| CA07          | HA             | ADTLCIGYHANNSTDTVD  | P1                  |
| CA07          | HA             | HANNSTDTVDTVLEKNVT  | P1                  |
| CA07          | HA             | VDTVLEKNVTVTHSVNLL  | P1                  |
| CA07          | HA             | VTVTHSVNLLLEDKHNGKL | P1                  |
| CA07          | HA             | LLEDKHNGKLCKLRGVAPL | P1                  |
| CA07          | HA             | KLCKLRGVAPLHLGKCNI  | P1                  |
| CA07          | HA             | APLHLGKCNIAGWILGNPE | P1                  |
| CA07          | HA             | NIAGWILGNPECESLSTAS | P1                  |
| CA07          | HA             | NPECESLSTASSWSYIVE  | P1                  |
| CA07          | HA             | TASSWSYIVETPSSDNGT  | P1                  |
| CA07          | HA             | VETPSSDNGTCYPGDFID  | P1                  |
| CA07          | HA             | GTCYPGDFIDYEELREQL  | P1                  |
| CA07          | HA             | IDYEELREQLSSVSSFER  | P1                  |
| CA07          | HA             | QLSSVSSFERFEIFPKTS  | P1                  |
| CA07          | HA             | ERFEIFPKTSSWPNHDSN  | P1                  |
| CA07          | HA             | TSSWPNHDSNKGVTAACPH | P1                  |
| CA07          | HA             | SNKGVTAACPHAGAKSFY  | P1                  |
| CA07          | HA             | CPHAGAKSFYKNLIWLVK  | P1                  |
| CA07          | HA             | FYKNLIWLVKKGNSYPKLS | P1                  |
| CA07          | HA             | VKKGNSYPKLSKSYINDK  | P1                  |
| CA07          | HA             | KLSKSYINDKGKEVLVLW  | P1                  |
| CA07          | HA             | DKGKEVLVLWGIHHPSTS  | P2                  |
| CA07          | HA             | LWGIHHPSTSADQQSLYQ  | P2                  |
| CA07          | HA             | TSADQQSLYQNADAYVVFV | P2                  |
| CA07          | HA             | YQNADAYVFGSSRYSKK   | P2                  |
| CA07          | HA             | FVGSSRYSKKFKPEIAIR  | P2                  |
| CA07          | HA             | KKFKPEIAIRPKVRDQEG  | P2                  |
| CA07          | HA             | IRPKVRDQEGRMNYYWTL  | P2                  |
| CA07          | HA             | EGRMNYWTLVEPGDKIT   | P2                  |
| CA07          | HA             | TLVEPGDKITFEATGNLV  | P2                  |
| CA07          | HA             | ITFEATGNLVVPRYAFAM  | P2                  |
| CA07          | HA             | LVVPRYAFAMERNAGSGI  | P2                  |
| CA07          | HA             | AMERNAGSGIIISDTPVH  | P2                  |
| CA07          | HA             | GIIISDTPVHDCNTTCQT  | P2                  |
| CA07          | HA             | VHDCNTTCQTPKGAINTS  | P2                  |
| CA07          | HA             | QTPKGAINTSLPFQNIHPI | P2                  |
| CA07          | HA             | TSLPFQNIHPITIGKCPKY | P2                  |
| CA07          | HA             | HPITIGKCPKYVKSTKLR  | P2                  |
| CA07          | HA             | PKYVKSTKLRRLATGLRNI | P2                  |
| CA07          | HA             | LRLATGLRNIPSIQSRGL  | P2                  |
| CA07          | HA             | NIPSIQSRGLFGAIAGFI  | P2                  |
| CA07          | HA             | GLFGAIAGFIEGGWTGMV  | P2                  |
| CA07          | HA             | FIEGGWTGMVDGWYGYHH  | P2                  |
| CA07          | HA             | MVDGWYGYHHQNEQGSY   | P2                  |
| CA07          | HA             | HHQNEQGSYAADLKSTQ   | P3                  |
| CA07          | HA             | GYAADLKSTQNAIDEITN  | P3                  |
| CA07          | HA             | TQNAIDEITNKVNSVIEK  | P3                  |
| CA07          | HA             | TNKVNSVIEKMNTQFTAV  | P3                  |
| CA07          | HA             | EKMNTQFTAVGKEFNHLE  | P3                  |
| CA07          | HA             | AVGKEFNHLEKRIENLNK  | P3                  |
| CA07          | HA             | LEKRIENLNKKVDDGFLD  | P3                  |

|         |    |                     |    |
|---------|----|---------------------|----|
| CA07    | HA | NKKVDDGFLDIWTYNAEL  | P3 |
| CA07    | HA | LDIWTYNAELLVLENER   | P3 |
| CA07    | HA | ELLVLENERITLDYHDSN  | P3 |
| CA07    | HA | ERTLDYHDSNVKNLYEKV  | P3 |
| CA07    | HA | SNVKNLYEKVRSQKNNNA  | P3 |
| CA07    | HA | KVRSQKNNNAKEIGNGCF  | P3 |
| CA07    | HA | NAKEIGNGCFEFYHKCDN  | P3 |
| CA07    | HA | CFEFYHKCDNTCMESVKN  | P3 |
| CA07    | HA | DNTCMESVKNNGTYDYPKY | P3 |
| CA07    | HA | KNGTYDYPKYSEEAKLNR  | P3 |
| CA07    | HA | KYSEEAKLNREEIDGVKL  | P3 |
| CA07    | HA | NREEIDGVKLESTRIYQI  | P3 |
| CA07    | HA | KLESTRIYQILAIYSTVA  | P3 |
| CA07    | HA | QILAIYSTVASSLVLVVS  | P3 |
| CA07    | HA | VASSLVLVVSLGAISFWM  | P3 |
| CA07    | HA | VSLGAISFWMCSNGSLQC  | P3 |
| CA07    | HA | AISFWMCSNGSLQCRICI  | P3 |
| VIC210  | HA | MKTIIALSYILCLVFAQK  | P4 |
| VIC210  | HA | YILCLVFAQKLPGNDNST  | P4 |
| VIC210  | HA | QKLPGNDNSTATLCLGHH  | P4 |
| VIC210  | HA | STATLCLGHHAVPNGTIV  | P4 |
| VIC210  | HA | HHAVPNGTIVKTITNDQI  | P4 |
| VIC210  | HA | IVKTITNDQIEVTNATEL  | P4 |
| VIC210  | HA | QIEVTNATELVQNSSTGEI | P4 |
| VIC210  | HA | ELVQNSSTGEICDSPHQI  | P4 |
| VIC210  | HA | GEICDSPHQILDGKNCTLI | P4 |
| VIC210  | HA | QILDGKNCTLIDALLGDPQ | P4 |
| VIC210  | HA | TLIDALLGDPQCDGFQNK  | P4 |
| VIC210  | HA | DPQCDGFQNKKWDLFVER  | P4 |
| VIC210  | HA | NKKWDLFVERSKAYSNCY  | P4 |
| VIC210  | HA | ERSKAYSNCYPYDVPDYA  | P4 |
| VIC210  | HA | CYPYDVPDYASLRSLVAS  | P4 |
| VIC210  | HA | YASLRSLVASSGTLEFNN  | P4 |
| VIC210  | HA | ASSGTLEFNNEFNTWTGV  | P4 |
| VIC210  | HA | NNESFNWTGVTQNGTSSAC | P4 |
| VIC210  | HA | GVTQNGTSSACIRRSKNS  | P4 |
| VIC210  | HA | SACIRRSKNSFFSRLNWL  | P4 |
| VIC210  | HA | NSFFSRLNWLTLNLFKYPA | P4 |
| VIC210  | HA | WLTNLFKYPALNVTMPN   | P4 |
| VIC210  | HA | YPALNVTMPNNEQFDKLY  | P4 |
| VIC210  | HA | PNNEQFDKLYIWGVHHPV  | P5 |
| VIC210  | HA | LYIWGVHHPVTDKQIFL   | P5 |
| VIC210  | HA | PVTDKQIFLYAQASGRI   | P5 |
| VIC210  | HA | FLYAQASGRITVSTKRSQ  | P5 |
| VIC210  | HA | RITVSTKRSQQTVIPNIG  | P5 |
| VIC210  | HA | SQQTVIPNIGSRPRVRNI  | P5 |
| VIC210  | HA | IGSRPRVRNIPSRISIW   | P5 |
| VIC210  | HA | NIPSRISIWTVKPGDI    | P5 |
| VIC210  | HA | YWTIVKPGDILLINSTGN  | P5 |
| VIC210  | HA | DILLINSTGNLIAPRGYF  | P5 |
| VIC210  | HA | GNLIAPRGYFKMQSGKSS  | P5 |
| VIC210  | HA | YFKMQSGKSSIMRSDAPI  | P5 |
| VIC210  | HA | SSIMRSDAPIGKCNSECI  | P5 |
| Perth16 | HA | PIGKCNSECITPNGSIPN  | P5 |



|         |    |                     |    |
|---------|----|---------------------|----|
| Perth16 | HA | CITPNGSIPNDKPFQNVNR | P5 |
| Perth16 | HA | PNDKPFQNVNRITYGACPR | P5 |
| Perth16 | HA | VNRITYGACPRYVKQNTL  | P5 |
| Perth16 | HA | CPRYVKQNTLKLATGMRN  | P5 |
| Perth16 | HA | TLKLATGMRNVPEKQTRG  | P5 |
| VIC210  | HA | NVPEKQTRGIFGAIAGFI  | P5 |
| VIC210  | HA | GIFGAIAGFIENGWEGMV  | P5 |
| VIC210  | HA | FIENGWEGMVDGWYGFRH  | P5 |
| VIC210  | HA | MVDGWYGFRHQNSEGRGQ  | P5 |
| VIC210  | HA | RHQNSEGRGQAADLKSTQ  | P6 |
| VIC210  | HA | GQAADLKSTQAAIDQING  | P6 |
| VIC210  | HA | TQAAIDQINGKLNRLIGK  | P6 |
| VIC210  | HA | NGKLNRLIGKTNEKFHQI  | P6 |
| VIC210  | HA | GKTNEKFHQIEKEFSEVE  | P6 |
| VIC210  | HA | QIEKEFSEVEGRIQDLEK  | P6 |
| VIC210  | HA | VEGRIQDLEKYVEDTKID  | P6 |
| VIC210  | HA | EKYVEDTKIDLWSYNAEL  | P6 |
| VIC210  | HA | IDLWSYNAELLVALENQH  | P6 |
| VIC210  | HA | ELLVALENQHTIDLTLDSE | P6 |
| VIC210  | HA | QHTIDLTLDSEMKNLFEKT | P6 |
| VIC210  | HA | SEMKNLFEKTKKQLRENA  | P6 |
| VIC210  | HA | KTKKQLRENAEDMGNGCF  | P6 |
| VIC210  | HA | NAEDMGNGCFKIYHKCDN  | P6 |
| VIC210  | HA | CFKIYHKCDNACIGSIRN  | P6 |
| VIC210  | HA | DNACIGSIRNGTYDHNVY  | P6 |
| VIC210  | HA | RNGTYDHNVYRDEALNNR  | P6 |
| VIC210  | HA | VYRDEALNNRFQIKGVEL  | P6 |
| VIC210  | HA | NRFQIKGVELKSGYKDWI  | P6 |
| VIC210  | HA | ELKSGYKDWILWISFAIS  | P6 |
| VIC210  | HA | WILWISFAISCFLLCVAL  | P6 |
| VIC210  | HA | ISCFLLCVALLGFIMWAC  | P6 |
| VIC210  | HA | ALLGFIMWACQKGNIRCN  | P6 |
| VIC210  | HA | GFIMWACQKGNIRCNICI  | P6 |
| CA07    | M1 | MSLLTEVETYVLSIIPSG  | P7 |
| CA07    | M1 | TYVLSIIPSGPLKAEIAQ  | P7 |
| CA07    | M1 | SGPLKAEIAQRLESVFAG  | P7 |
| CA07    | M1 | AQRLESVFAGKNTDLEAL  | P7 |
| CA07    | M1 | QNALNGNGDPNNMDRAVK  | P7 |
| CA07    | M1 | DPNNMDRAVKLYKCLKRE  | P7 |
| CA07    | M1 | VKLYKCLKREITFHGAKE  | P7 |
| CA07    | M1 | REITFHGAKEVSLSYSTG  | P7 |
| CA07    | M1 | KEVSLSYSTGALASCMGL  | P7 |
| CA07    | M1 | TGALASCMGLIYNRMGTV  | P7 |
| CA07    | M1 | GLIYNRMGTVTTEAAFGL  | P7 |
| CA07    | M1 | TVTTEAAFGLVCATCEQI  | P7 |
| CA07    | M1 | QIADSQHRSHRQMATTTN  | P7 |
| CA07    | M1 | SHRQMATTTNPLIRHENR  | P7 |
| CA07    | M1 | TNPLIRHENRMVLASTTA  | P7 |
| CA07    | M1 | AGSSEQAAEAMEVANQTR  | P7 |
| CA07    | M1 | EAMEVANQTRQMVHAMRT  | P7 |
| CA07    | M1 | TRQMVHAMRTIGTHPSSS  | P7 |
| CA07    | M1 | RTIGTHPSSSAGLKDDL   | P7 |
| CA07    | M1 | SSAGLKDDLLENLQAYQK  | P7 |
| CA07    | M1 | LENLQAYQKRMGVQMQR   | P7 |

|             |    |                     |     |
|-------------|----|---------------------|-----|
| CA07        | M1 | ENLQAYQKRMGVQMQRFK  | P7  |
| VIC210      | M1 | MSLLTEVETYVLSIVPSG  | P8  |
| VIC210      | M1 | TYVLSIVPSGPLKAEIAQ  | P8  |
| VIC210      | M1 | SGPLKAEIAQRLEDVFAG  | P8  |
| VIC210      | M1 | AQRLEDVFAGKNTDLEAL  | P8  |
| VIC210      | M1 | QNALNGNGDPNNMDKAVK  | P8  |
| VIC210      | M1 | DPNNMDKAVKLYRKLKRE  | P8  |
| VIC210      | M1 | VKLYRKLKREITFHGAKE  | P8  |
| VIC210      | M1 | REITFHGAKEIALSYSAG  | P8  |
| VIC210      | M1 | KEIALSYSAGALASCMGL  | P8  |
| VIC210      | M1 | AGALASCMGLIYNRMGAV  | P8  |
| VIC210      | M1 | GLIYNRMGAVTTEVAFGL  | P8  |
| VIC210      | M1 | AVTTEVAFGLVCATCEQI  | P8  |
| VIC210      | M1 | QIADSQHRSHRQMVATTN  | P8  |
| VIC210      | M1 | SHRQMVATTNPLIKHENR  | P8  |
| VIC210      | M1 | TNPLIKHENRMVLASTTA  | P8  |
| VIC210      | M1 | AGSSEQAAEAMEIASQAR  | P8  |
| VIC210      | M1 | EAMEIASQARQMVQAMRA  | P8  |
| VIC210      | M1 | ARQMVQAMRAIGTHPSSS  | P8  |
| VIC210      | M1 | RAIGTHPSSSTGLRDDLL  | P8  |
| VIC210      | M1 | SSTGLRDDLLENLQTYQK  | P8  |
| VIC210      | M1 | LLENLQTYQKRMGVQMQR  | P8  |
| VIC210      | M1 | ENLQTYQKRMGVQMQRFK  | P8  |
| CA07/VIC210 | M1 | AGKNTDLEALMEWLKTRPI | P9  |
| CA07/VIC210 | M1 | ALMEWLKTRPILSPLTKG  | P9  |
| CA07/VIC210 | M1 | RPILSPLTKGILGFVFTL  | P9  |
| CA07/VIC210 | M1 | KGILGFVFTLTVPSERGL  | P9  |
| CA07/VIC210 | M1 | TLTVPSERGLQRRRFVQN  | P9  |
| CA07/VIC210 | M1 | GLQRRRFVQNALNGNGDPN | P9  |
| CA07/VIC210 | M1 | GLVCATCEQIADSQHRSH  | P9  |
| CA07/VIC210 | M1 | NRMVLASTTAKAMEQMAG  | P9  |
| CA07/VIC210 | M1 | TAKAMEQMAGSSEQAAEA  | P9  |
| CA07        | M2 | MSLLTEVETPTRSEWECR  | P10 |
| CA07        | M2 | TPTRSEWECRCSDSSDPL  | P10 |
| CA07        | M2 | CRCSDSSDPLVIAANIIG  | P10 |
| CA07        | M2 | PLVIAANIIGILHLILWI  | P10 |
| CA07        | M2 | IGILHLILWITDRLFFKC  | P10 |
| CA07        | M2 | WITDRLFFKCIYRRFKYG  | P10 |
| CA07        | M2 | KCIYRRFKYGLKRGPESTE | P10 |
| CA07        | M2 | YGLKRGPESTEGVPESMRE | P10 |
| CA07        | M2 | TEGVPESMREEYQQEQQS  | P10 |
| CA07        | M2 | REEYQQEQQSAVDVDDGH  | P10 |
| CA07        | M2 | QQSAVDVDDGHFVNIELE  | P10 |
| VIC210      | M2 | MSLLTEVETPIRNEWGCR  | P11 |
| VIC210      | M2 | TPIRNEWGCRCNDSSDPL  | P11 |
| VIC210      | M2 | CRCNDSSDPLVVAANIIG  | P11 |
| VIC210      | M2 | PLVVAANIIGILHLILWI  | P11 |
| VIC210      | M2 | IGILHLILWILDRLFFKC  | P11 |
| VIC210      | M2 | WILDRLFFKCVYRLFKHG  | P11 |
| VIC210      | M2 | KCVYRLFKHGLKRGPESTE | P11 |
| VIC210      | M2 | HGLKRGPESTEGVPESMRE | P11 |
| VIC210      | M2 | TEGVPESMREEYRKEQQN  | P11 |
| VIC210      | M2 | REEYRKEQQNAVDADDSH  | P11 |
| VIC210      | M2 | QQNAVDADDSHFVSIELE  | P11 |

|      |    |                      |     |
|------|----|----------------------|-----|
| CA07 | NA | MNPNQKIITIGSVCM TIG  | P12 |
| CA07 | NA | TIGSVCM TIGMANLILQI  | P12 |
| CA07 | NA | IGMANLILQIGNIISIWI   | P12 |
| CA07 | NA | QIGNIISIWISHSIQLGN   | P12 |
| CA07 | NA | WISHSIQLGNQNIETCN    | P12 |
| CA07 | NA | GNQNQIETCNQSVITYEN   | P12 |
| CA07 | NA | CNQSVITYENNTWVNQTY   | P12 |
| CA07 | NA | ENNTWVNQTYVNI SNTNF  | P12 |
| CA07 | NA | TYVNI SNTNF AAGQSVVS | P12 |
| CA07 | NA | NFAAGQSVVSVKLAGNSSL  | P12 |
| CA07 | NA | VSVKLAGNSSLCPVSGWA   | P12 |
| CA07 | NA | SSLCPVSGWAIYSKDNSV   | P12 |
| CA07 | NA | WAIYSKDNSVRIGSKGDV   | P12 |
| CA07 | NA | SVRIGSKGDV FVIREPFI  | P12 |
| CA07 | NA | DV FVIREPFISCSPLECR  | P12 |
| CA07 | NA | FISCSPLECRTFFLTQGA   | P12 |
| CA07 | NA | CRTFFLTQGALLNDKHSN   | P12 |
| CA07 | NA | GALLNDKHSNGTIKDRSPY  | P12 |
| CA07 | NA | SNGTIKDRSPYRTL MSCPI | P12 |
| CA07 | NA | SPYRTL MSCPIGEVPSPY  | P12 |
| CA07 | NA | CPIGEVPSPYNSRFESVA   | P12 |
| CA07 | NA | PYNSRFESVAWSASACHD   | P12 |
| CA07 | NA | VAWSASACHDGINWLTIG   | P13 |
| CA07 | NA | HDGINWLTIGISGPDNGA   | P13 |
| CA07 | NA | IGISGPDNGAVAVLKYNG   | P13 |
| CA07 | NA | GAVAVLKYNGIITDTIKS   | P13 |
| CA07 | NA | NGIITDTIKSWRNNILRT   | P13 |
| CA07 | NA | KSWRNNILRTQESECACV   | P13 |
| CA07 | NA | RTQESECACVNGSCFTVM   | P13 |
| CA07 | NA | CVNGSCFTVMTDGPSNGQ   | P13 |
| CA07 | NA | VMTDGPSNGQASYKIFRI   | P13 |
| CA07 | NA | GQASYKIFRIEKGKIVKS   | P13 |
| CA07 | NA | RIEKGKIVKSVEMNAPNY   | P13 |
| CA07 | NA | KSVEMNAPNYHYEECSY    | P13 |
| CA07 | NA | NYHYEECSY PDSSEITC   | P13 |
| CA07 | NA | CYPDSSEITCVCRDNWHG   | P13 |
| CA07 | NA | TCVCRDNWHG SNRPWVSF  | P13 |
| CA07 | NA | HG SNRPWVSFNQNLEYQI  | P13 |
| CA07 | NA | SFNQNLEYQIGYICSGIF   | P13 |
| CA07 | NA | QIGYICSGIFGDNPRPND   | P13 |
| CA07 | NA | IFGDNPRPNDKTGSCGPV   | P13 |
| CA07 | NA | NDKTGSCGPVSSNGANGV   | P13 |
| CA07 | NA | PVSSNGANGVKGFSYKYG   | P13 |
| CA07 | NA | GVKGFYKYGNVWIGRT     | P13 |
| CA07 | NA | YGNVWIGRTKSISSRNG    | P14 |
| CA07 | NA | RTKSISSRNGFEMI WDPN  | P14 |
| CA07 | NA | NGFEMI WDPNGWTGTDNNF | P14 |
| CA07 | NA | PNGWTGTDNNF SIKQDIV  | P14 |
| CA07 | NA | NNFSIKQDIVGINEWSGY   | P14 |
| CA07 | NA | IVGINEWSGYSGSFVQHPE  | P14 |
| CA07 | NA | GYSGSFVQHPELTGLDCI   | P14 |
| CA07 | NA | HPELTGLDCIRPCFWVEL   | P14 |
| CA07 | NA | CIRPCFWVELIRGRP KEN  | P14 |
| CA07 | NA | ELIRGRP KENTIWTSGSS  | P14 |

|        |    |                     |     |
|--------|----|---------------------|-----|
| CA07   | NA | ENTIWTSGSSISFCGVNS  | P14 |
| CA07   | NA | SSISFCGVNSDTVGSWSPD | P14 |
| CA07   | NA | NSDTVGSWSPDGAELPFT  | P14 |
| CA07   | NA | TVGSWSPDGAELPFTIDK  | P14 |
| VIC210 | NA | MNPNQKIITIGSVSLTIS  | P15 |
| VIC210 | NA | TIGSVSLTISTICFFMQI  | P15 |
| VIC210 | NA | ISTICFFMQIAILITTVT  | P15 |
| VIC210 | NA | QIAILITTVTLHFKQYEF  | P15 |
| VIC210 | NA | VTLHFKQYEFNSPPNNQV  | P15 |
| VIC210 | NA | EFNSPPNNQVMLCEPTII  | P15 |
| VIC210 | NA | QVMLCEPTIERNITEIV   | P15 |
| VIC210 | NA | IERNITEIVYLTNTTIE   | P15 |
| VIC210 | NA | IVYLTNTTIEKEICPKLA  | P15 |
| VIC210 | NA | IEKEICPKLAEYRNWSKPQ | P15 |
| VIC210 | NA | LAEYRNWSKPQCDITGFA  | P15 |
| VIC210 | NA | KPQCDITGFAPFSKDNSI  | P15 |
| VIC210 | NA | FAPFSKDNSIRLSAGGDI  | P15 |
| VIC210 | NA | SIRLSAGGDIWVTREPYV  | P15 |
| VIC210 | NA | DIWVTREPYVSCDPDKCY  | P15 |
| VIC210 | NA | YVSCDPDKCYQFALGQGT  | P15 |
| VIC210 | NA | CYQFALGQGTTLNNVHSN  | P15 |
| VIC210 | NA | GTTLNNVHSNNTVRDRTPY | P15 |
| VIC210 | NA | SNNTVRDRTPYRTLLMNEL | P15 |
| VIC210 | NA | TPYRTLLMNELGVPFHLG  | P15 |
| VIC210 | NA | NELGVPFHLGKQVCIW    | P15 |
| VIC210 | NA | LGTKQVCIWSSSSSCHDG  | P15 |
| VIC210 | NA | AWSSSSCHDGKAWLHVC   | P16 |
| VIC210 | NA | DGKAWLHVCITGDDKNAT  | P16 |
| VIC210 | NA | CITGDDKNATASFIYNGR  | P16 |
| VIC210 | NA | ATASFIYNGRLVDSVVS   | P16 |
| VIC210 | NA | GRLVDSVVSWSKEILRTQ  | P16 |
| VIC210 | NA | SWSKEILRTQESECVIN   | P16 |
| VIC210 | NA | TQESECVINGTCTVVM    | P16 |
| VIC210 | NA | INGTCTVVMTDGSASGKA  | P16 |
| VIC210 | NA | MTDGSASGKADTKILFIE  | P16 |
| VIC210 | NA | KADTKILFIEEGKIVHTS  | P16 |
| VIC210 | NA | IIEGKIVHTSTLSGSAQH  | P16 |
| VIC210 | NA | TSTLSGSAQHVEECSCYPR | P16 |
| VIC210 | NA | QHVEECSCYPRYPGVRCV  | P16 |
| VIC210 | NA | YPRYPGVRCVCRDNWKGS  | P16 |
| VIC210 | NA | CVCRDNWKGSNRPIVDIN  | P16 |
| VIC210 | NA | GSRPIVDINIKDHSIVS   | P16 |
| VIC210 | NA | INIKDHSIVSSYVCSGLV  | P16 |
| VIC210 | NA | VSSYVCSGLVGDTPRKN   | P16 |
| VIC210 | NA | LVGDTPRKNDSSSSSHCL  | P16 |
| VIC210 | NA | NDSSSSSHCLDPNNEEGG  | P16 |
| VIC210 | NA | CLDPNNEEGGHGVKGWAF  | P16 |
| VIC210 | NA | GGHGVKGWAFDDGNDVWM  | P16 |
| VIC210 | NA | AFDDGNDVWMGRTISEKS  | P17 |
| VIC210 | NA | WMGRTISEKSRLGYETFK  | P17 |
| VIC210 | NA | KSRLGYETFKVIEGWSNPK | P17 |
| VIC210 | NA | FKVIEGWSNPKSKLQINR  | P17 |
| VIC210 | NA | NPKSKLQINRQVIVDRGN  | P17 |
| VIC210 | NA | NRQVIVDRGNRSGYSGIFS | P17 |

|        |    |                     |     |
|--------|----|---------------------|-----|
| VIC210 | NA | GNRSGYSGIFSVEGKSCI  | P17 |
| VIC210 | NA | IFSVEGKSCINRCFYVEL  | P17 |
| VIC210 | NA | CINRCFYVELIRGRKEET  | P17 |
| VIC210 | NA | ELIRGRKEETEVLWTSNS  | P17 |
| VIC210 | NA | ETEVLWTSNSIVVFCGTS  | P17 |
| VIC210 | NA | NSIVVFCGTSPTYGTGSW  | P17 |
| VIC210 | NA | TSGTYGTGSWPDGADINL  | P17 |
| VIC210 | NA | TYGTGSWPDGADINLMPI  | P17 |
| CA07   | NP | MASQGTKRSYEQMETGGE  | P18 |
| CA07   | NP | SYEQMETGGERQDATEIR  | P18 |
| CA07   | NP | GERQDATEIRASVGRMIG  | P18 |
| CA07   | NP | IRASVGRMIGGIGRFYIQ  | P18 |
| CA07   | NP | IGGIGRFYIQMCTELKLS  | P18 |
| CA07   | NP | IQMCTELKLSDYDGRLIQ  | P18 |
| CA07   | NP | LSDYDGRLIQNSITIERM  | P18 |
| CA07   | NP | IQNSITIERMVLSAFDER  | P18 |
| CA07   | NP | RMVLSAFDERRNKYLEEH  | P18 |
| CA07   | NP | YRRVDGKWMRELILYDKE  | P18 |
| CA07   | NP | MRELILYDKEEIRRVRQ   | P18 |
| CA07   | NP | KEEIRRVRQANNGEDAT   | P18 |
| CA07   | NP | RQANNGEDATAGLTHIMI  | P18 |
| CA07   | NP | ATAGLTHIMIWHSNLNDA  | P18 |
| CA07   | NP | GSTLPRRSGAAGAAVKGV  | P18 |
| CA07   | NP | GAAGAAVKGVGTIAMELI  | P18 |
| CA07   | NP | GVGTIAMELIRMIKRGIN  | P18 |
| CA07   | NP | LIRMIKRGINDRNFWRGE  | P18 |
| CA07   | NP | INDRNFWRGENGRRTRVA  | P18 |
| CA07   | NP | GENGRRTRVAYERMCNIL  | P18 |
| CA07   | NP | VAYERMCNILKGKFQTA   | P18 |
| CA07   | NP | ILKGKFQTAQAQRAMMDQV | P18 |
| CA07   | NP | AAQRAMMDQVRESRNPNG  | P18 |
| CA07   | NP | ILRGSVAHKSCLPACVYG  | P18 |
| CA07   | NP | KSCLPACVYGLAVASGHD  | P19 |
| CA07   | NP | YGLAVASGHDFEREGYSL  | P19 |
| CA07   | NP | HDFEREGYSLVGIDPFKL  | P19 |
| CA07   | NP | SLVGIDPFKLLQNSQVVS  | P19 |
| CA07   | NP | KLLQNSQVVSMLRPNENPA | P19 |
| CA07   | NP | VSLMRPNENPAHKSQVLW  | P19 |
| CA07   | NP | VWMACHSAAFEDLRVSSF  | P19 |
| CA07   | NP | AFEDLRVSSFIRGKKVIPR | P19 |
| CA07   | NP | SFIRGKKVIPRGKLSTRG  | P19 |
| CA07   | NP | IPRGKLSTRGVQIASNEN  | P19 |
| CA07   | NP | RGVQIASNENVETMDSNT  | P19 |
| CA07   | NP | ENVETMDSNTLELRSRYW  | P19 |
| CA07   | NP | NTLELRSRYWAIRTRSGG  | P19 |
| CA07   | NP | YWAIRTRSGGNTNQQKAS  | P19 |
| CA07   | NP | GGNTNQQKASAGQISVQPT | P19 |
| CA07   | NP | ASAGQISVQPTFSVQRNL  | P19 |
| CA07   | NP | QPTFSVQRNLPFERATVM  | P19 |
| CA07   | NP | NLPFERATVMAAFSGNNE  | P19 |
| CA07   | NP | VMAAFSGNNEGRTSDMRT  | P19 |
| CA07   | NP | NEGRTSDMRTEVIRMMES  | P19 |
| CA07   | NP | RTEVIRMMESAKPEDLSF  | P19 |
| CA07   | NP | ESAKPEDLSFQGRGVFEL  | P19 |

|             |    |                      |     |
|-------------|----|----------------------|-----|
| CA07        | NP | SFQGRGVFELSDEKATNPI  | P19 |
| CA07        | NP | MSNEGSYFFGDNAEEYDS   | P19 |
| VIC210      | NP | MASQGTKRSYEQMETDGD   | P20 |
| VIC210      | NP | SYEQMETDGDRQNATEIR   | P20 |
| VIC210      | NP | GDRQNATEIRASVGKMID   | P20 |
| VIC210      | NP | IRASVGKMIDGIGRFYIQ   | P20 |
| VIC210      | NP | IDGIGRFYIQMCTELKLS   | P20 |
| VIC210      | NP | IQMCTELKLSDHEGRLIQ   | P20 |
| VIC210      | NP | LSDHEGRLIQNSLTIEKM   | P20 |
| VIC210      | NP | IQNSLTIEKMVLSAFDER   | P20 |
| VIC210      | NP | KMVLSAFDERRNKYLEEH   | P20 |
| VIC210      | NP | YRRVDGKWMRELVLYDKE   | P20 |
| VIC210      | NP | MRELVLYDKEEIRRIWRQ   | P20 |
| VIC210      | NP | KEEIRRIWRQANNGEDAT   | P20 |
| VIC210      | NP | RQANNGEDATSGLTHIMI   | P20 |
| VIC210      | NP | ATSGLTHIMIWHSNLNDA   | P20 |
| VIC210      | NP | GSTLPRRSGAAGA AVKGI  | P20 |
| VIC210      | NP | GAAGA AVKIGTMVMELI   | P20 |
| VIC210      | NP | GIGTMVMELIRMVKRGIN   | P20 |
| VIC210      | NP | LIRMVKRGINDRNFWRGE   | P20 |
| VIC210      | NP | INDRNFWRGENGRKTRSA   | P20 |
| VIC210      | NP | GENGRKTRSAYERMCNIL   | P20 |
| VIC210      | NP | SAYERMCNILKGKFQTA    | P20 |
| VIC210      | NP | ILKGKFQTA AQRAMVDQV  | P20 |
| VIC210      | NP | AAQRAMVDQVRESRNP     | P20 |
| VIC210      | NP | ILRGVAHK SCLPACAYG   | P20 |
| VIC210      | NP | KSCLPACAYGPAVSSGYD   | P21 |
| VIC210      | NP | YGP AVSSGYDFEKEGYSL  | P21 |
| VIC210      | NP | YDFEKEGYSLVGIDPFKL   | P21 |
| VIC210      | NP | SLVGIDPFKLLQNSQIYS   | P21 |
| VIC210      | NP | KLLQNSQIYSLIRPNENPA  | P21 |
| VIC210      | NP | YSLIRPNENPAHKSQLVW   | P21 |
| VIC210      | NP | VWMACHSAAFEDLRLLSF   | P21 |
| VIC210      | NP | AFEDLRLLSFIRGTKVSPR  | P21 |
| VIC210      | NP | SFIRGTKVSPRGKLSTRG   | P21 |
| VIC210      | NP | SPRGKLSTRGVQIASNEN   | P21 |
| VIC210      | NP | RGVQIASNENMDNMGSST   | P21 |
| VIC210      | NP | ENMDNMGSSTLELRSGYW   | P21 |
| VIC210      | NP | STLELRSGYW AIRTRSGG  | P21 |
| VIC210      | NP | YWAIRTRSGGNTNQQRAS   | P21 |
| VIC210      | NP | GGNTNQQRASAGQTSVQPT  | P21 |
| VIC210      | NP | ASAGQTSVQPTFSVQRNL   | P21 |
| VIC210      | NP | QPTFSVQRNLPFEKSTIM   | P21 |
| VIC210      | NP | NLPFEKSTIMAAFTGNT    | P21 |
| VIC210      | NP | IMAAFTGNT EGRTSDMRA  | P21 |
| VIC210      | NP | TEGRTSDMRAE IIRMMES  | P21 |
| VIC210      | NP | RAE IIRMMESAKPEEV SF | P21 |
| VIC210      | NP | ESAKPEEV SFRGRGV FEL | P21 |
| VIC210      | NP | SFRGRGV FELSDEKATNPI | P21 |
| VIC210      | NP | MSNEGSYFFGDNAEEYDN   | P21 |
| CA07/VIC210 | NP | ERRNKYLEEHPSAGKDPK   | P22 |
| CA07/VIC210 | NP | EHPSAGKDPKKTGGPIYR   | P22 |
| CA07/VIC210 | NP | PKKTGGPIYRRVDGKWMR   | P22 |
| CA07/VIC210 | NP | MIWHSNLNDATYQRTRAL   | P22 |

|             |     |                     |     |
|-------------|-----|---------------------|-----|
| CA07/VIC210 | NP  | DATYQRTRALVRTGMDPR  | P22 |
| CA07/VIC210 | NP  | ALVRTGMDPRMCSLMQGS  | P22 |
| CA07/VIC210 | NP  | PRMCSLMQGSTLPRRSGA  | P22 |
| CA07/VIC210 | NP  | QVRESRNPGNAEIEDLIF  | P22 |
| CA07/VIC210 | NP  | GNAEIEDLIFLARSALIL  | P22 |
| CA07/VIC210 | NP  | IFLARSALILRGSVAHKS  | P22 |
| CA07/VIC210 | NP  | NPAHKSQVLVWMACHSAAF | P22 |
| CA07/VIC210 | NP  | ELSDEKATNPVPSFDMS   | P22 |
| CA07/VIC210 | NP  | NPVPSFDMSNEGSYFFG   | P22 |
| CA07        | NS1 | MDSNTMSSFQVDCFLWHI  | P23 |
| CA07        | NS1 | FQVDCFLWHIRKRFADNG  | P23 |
| CA07        | NS1 | HIRKRFADNGLGDAPFLD  | P23 |
| CA07        | NS1 | NGLGDAPFLDRLRRDQKS  | P23 |
| CA07        | NS1 | LDRLRRDQKSLKGRGNTL  | P23 |
| CA07        | NS1 | KSLKGRGNTLGLDIETAT  | P23 |
| CA07        | NS1 | TLGLDIETATLVGKQIVE  | P23 |
| CA07        | NS1 | ATLVGKQIVEWILKEESS  | P23 |
| CA07        | NS1 | VEWILKEESSETLRMTIA  | P23 |
| CA07        | NS1 | SSETLRMTIASVPTSRYL  | P23 |
| CA07        | NS1 | IASVPTSRYLSDMTLEEM  | P23 |
| CA07        | NS1 | YLSDMTLEEMSRDWFMLM  | P23 |
| CA07        | NS1 | EMSRDWFMLMPRQKIIGPL | P23 |
| CA07        | NS1 | LMPRQKIIGPLCVRLDQA  | P23 |
| CA07        | NS1 | GPLCVRLDQAIMEKNIVL  | P24 |
| CA07        | NS1 | QAIMEKNIVLKANFSVIF  | P24 |
| CA07        | NS1 | VLKANFSVIFNRLETLIL  | P24 |
| CA07        | NS1 | IFNRLETLILLRAFTEEG  | P24 |
| CA07        | NS1 | ILLRAFTEEGAIVGEISPL | P24 |
| CA07        | NS1 | EGAIVGEISPLPSLPGHT  | P24 |
| CA07        | NS1 | SPLPSLPGHTYEDVKNVAV | P24 |
| CA07        | NS1 | HTYEDVKNVAVGLIGGLE  | P24 |
| CA07        | NS1 | AVGVLIGGLEWNGNTRVAV | P24 |
| CA07        | NS1 | LEWNGNTRVAVSENIQRFA | P24 |
| CA07        | NS1 | RVSENIQRFAWRNCDENG  | P24 |
| CA07        | NS1 | FAWRNCDENGRPSLPPEEQ | P24 |
| CA07        | NS1 | AWRNCDENGRPSLPPEEQK | P24 |
| VIC210      | NS1 | MDSNTVSSFQVDCFLWHI  | P25 |
| VIC210      | NS1 | FQVDCFLWHIRKQVVDQE  | P25 |
| VIC210      | NS1 | HIRKQVVDQEELSDAPFLD | P25 |
| VIC210      | NS1 | QEELSDAPFLDRLRRDQRS | P25 |
| VIC210      | NS1 | LDRLRRDQRSRLRGRGNTL | P25 |
| VIC210      | NS1 | RSLRGRGNTLGLDIKAAT  | P25 |
| VIC210      | NS1 | TLGLDIKAATHVGKQIVE  | P25 |
| VIC210      | NS1 | ATHVGKQIVEKILKEESD  | P25 |
| VIC210      | NS1 | VEKILKEESDEALKMTMV  | P25 |
| VIC210      | NS1 | SDEALKMTMVSTPASRYI  | P25 |
| VIC210      | NS1 | MVSTPASRYITDMTIEEL  | P25 |
| VIC210      | NS1 | YITDMTIEELSRNWFMLM  | P25 |
| VIC210      | NS1 | ELSRNWFMLMPKQKMEGPL | P25 |
| VIC210      | NS1 | LMPKQKMEGPLCIRMDQA  | P25 |
| VIC210      | NS1 | GPLCIRMDQAIMEKNIML  | P26 |
| VIC210      | NS1 | QAIMEKNIMLKANFSVIF  | P26 |
| VIC210      | NS1 | MLKANFSVIFDRLETIVL  | P26 |
| VIC210      | NS1 | IFDRLETIVLLRAFTEEG  | P26 |

|             |     |                     |     |
|-------------|-----|---------------------|-----|
| VIC210      | NS1 | VLLRAFTEEGAIVGEISPL | P26 |
| VIC210      | NS1 | EGAIVGEISPLPSFPGHT  | P26 |
| VIC210      | NS1 | SPLPSFPGHTIEDVKNAI  | P26 |
| VIC210      | NS1 | HTIEDVKNAIGVLIGGLE  | P26 |
| VIC210      | NS1 | AIGVLIGGLEWNDNTVRV  | P26 |
| VIC210      | NS1 | LEWNDNTVRVSKNLQRFA  | P26 |
| VIC210      | NS1 | RVSKNLQRFAWRSSNENG  | P26 |
| VIC210      | NS1 | FAWRSSNENGGSPKQ     | P26 |
| VIC210      | NS1 | NGGSPKQKREMARATA    | P26 |
| VIC210      | NS1 | PLPKQKREMARATRSKV   | P26 |
| CA07        | NS2 | MDSNTMSSFQDILMRMSK  | P27 |
| CA07        | NS2 | FQDILMRMSKMQLGSSSE  | P27 |
| CA07        | NS2 | SKMQLGSSSEDLNGMVTR  | P27 |
| CA07        | NS2 | SEDLNGMVTRFESLKIYR  | P27 |
| CA07        | NS2 | TRFESLKIYRDSLGETVM  | P27 |
| CA07        | NS2 | YRDSLGETVMRMGDLHYL  | P27 |
| CA07        | NS2 | VMRMGDLHYLQSRNEKWR  | P27 |
| CA07        | NS2 | YLQSRNEKWREQLGQKFE  | P27 |
| CA07        | NS2 | FEEIRWLIEEMRHLKAT   | P27 |
| CA07        | NS2 | EEMRHLKATENSFEQIT   | P27 |
| CA07        | NS2 | ATENSFEQITFMQALQLL  | P27 |
| CA07        | NS2 | ITFMQALQLLLEVEQEIR  | P27 |
| CA07        | NS2 | QLLLEVEQEIRAFSFQLI  | P27 |
| VIC210      | NS2 | MDSNTVSSFQDILLRMSK  | P28 |
| VIC210      | NS2 | FQDILLRMSKMQLGSSSE  | P28 |
| VIC210      | NS2 | SKMQLGSSSEDLNGMITQ  | P28 |
| VIC210      | NS2 | SEDLNGMITQFESLKIYR  | P28 |
| VIC210      | NS2 | TQFESLKIYRDSLGEAVM  | P28 |
| VIC210      | NS2 | YRDSLGEAVMRMGDLHLL  | P28 |
| VIC210      | NS2 | VMRMGDLHLLQNRNGKWR  | P28 |
| VIC210      | NS2 | LLQNRNGKWREQLGQKFE  | P28 |
| VIC210      | NS2 | FEEIRWLIEEVRHLKTT   | P28 |
| VIC210      | NS2 | EEVRHLKTTENSFEQIT   | P28 |
| VIC210      | NS2 | TTENSFEQITFMQALQLL  | P28 |
| VIC210      | NS2 | ITFMQALQLLFEVEQEIR  | P28 |
| VIC210      | NS2 | QLLFEVEQEIRTFSFQLI  | P28 |
| CA07/VIC210 | NS2 | WREQLGQKFEEIRWLIEE  | P28 |
| CA07        | PA  | AEKAMKEYGEDPKIETNK  | P29 |
| CA07        | PA  | GEDPKIETNKFAAICTHL  | P29 |
| CA07        | PA  | HLEVCFMYSDFHFIDERG  | P29 |
| CA07        | PA  | SDFHFIDERGESIIVESG  | P29 |
| CA07        | PA  | RGESIIVESGDPNALLKH  | P29 |
| CA07        | PA  | SGDPNALLKHRFEIIEGR  | P29 |
| CA07        | PA  | KHRFEIIEGRDRIMAWTV  | P29 |
| CA07        | PA  | GRDRIMAWTVVNSICNTT  | P29 |
| CA07        | PA  | TVVNSICNTTGVEKPKFL  | P29 |
| CA07        | PA  | TTGVEKPKFLPDLYDYKE  | P29 |
| CA07        | PA  | IYYLEKANKIKSEKTHIH  | P29 |
| CA07        | PA  | KIKSEKTHIHIFSFTGEE  | P29 |
| CA07        | PA  | ARIKTRLFTIRQEMASRS  | P29 |
| CA07        | PA  | TIRQEMASRSLWDSFRQS  | P29 |
| CA07        | PA  | RSLWDSFRQSERGEETIE  | P29 |
| CA07        | PA  | IIEKFEITGTMRKLADQS  | P29 |
| CA07        | PA  | GTMRKLADQSLPPNFPSL  | P29 |



|        |    |                      |     |
|--------|----|----------------------|-----|
| CA07   | PA | QSLPPNFPSLENFRAYVD   | P29 |
| CA07   | PA | LENFRAYVDGFEPNGCI    | P29 |
| CA07   | PA | CIEGKLSQMSKEVNAKIE   | P29 |
| CA07   | PA | MSKEVNAKIEPFLRTPR    | P29 |
| CA07   | PA | IEPFLRTPRPLRLPDGPL   | P29 |
| CA07   | PA | PRPLRLPDGPLCHQRSKF   | P30 |
| CA07   | PA | LQDIENEEKIPRTKNMKR   | P30 |
| CA07   | PA | KIPRTKNMKRTSQLKWAL   | P30 |
| CA07   | PA | KRTSQLKWALGENMAPEK   | P30 |
| CA07   | PA | ALGENMAPEKVDFDDCKD   | P30 |
| CA07   | PA | EKVDFDDCKDVGDLKQYD   | P30 |
| CA07   | PA | KDVGDLKQYDSDEPEPRS   | P30 |
| CA07   | PA | YDSDEPEPRSLASWVQNE   | P30 |
| CA07   | PA | RSLASWVQNEFNKACELT   | P30 |
| CA07   | PA | NEFNKACELTDSSWIELD   | P30 |
| CA07   | PA | LTDSSWIELDEIGEDVAPI  | P30 |
| CA07   | PA | WEKYCVLEIGDMLLRTAI   | P30 |
| CA07   | PA | IGDMLLRTAIGQVSRPMF   | P30 |
| CA07   | PA | AIGQVSRPMFLYVRTNGT   | P30 |
| CA07   | PA | MFLYVRTNGTSKIKMKWG   | P30 |
| CA07   | PA | GTSKIKMKWGMEMRRCLL   | P30 |
| CA07   | PA | SVKEKDMTKEFFENKSET   | P30 |
| CA07   | PA | KEFFENKSETWPIGESPR   | P30 |
| CA07   | PA | ETWPIGESPRGVEEGSIG   | P30 |
| CA07   | PA | PRGVEEGSIGKVCRTLLA   | P30 |
| CA07   | PA | GFSAESRLLLLIVQALRD   | P30 |
| CA07   | PA | LLLLIVQALRDNLEPGTFD  | P30 |
| VIC210 | PA | AEKAMKEYGEDLKIETNK   | P31 |
| VIC210 | PA | GEDLKIETNKFAAICTHL   | P31 |
| VIC210 | PA | HLEVCFMYSDFHFINEQG   | P31 |
| VIC210 | PA | SDFHFINEQGESIVVELD   | P31 |
| VIC210 | PA | QGESIVVELDDPNALLKH   | P31 |
| VIC210 | PA | LDDPNALLKHRFEIIEGR   | P31 |
| VIC210 | PA | KHRFEIIEGRDRTMAWTV   | P31 |
| VIC210 | PA | GRDRTMAWTVVNSICNTT   | P31 |
| VIC210 | PA | TVVNSICNTTGAGKPKFL   | P31 |
| VIC210 | PA | TTGAGKPKFLPDLYDYKE   | P31 |
| VIC210 | PA | IYYLEKANKIKSENTHIH   | P31 |
| VIC210 | PA | KIKSENTHIHIFSFTGEE   | P31 |
| VIC210 | PA | ARIKTRLFTIRQEMANRG   | P31 |
| VIC210 | PA | TIRQEMANRGLWDSFRQS   | P31 |
| VIC210 | PA | RGLWDSFRQSERGEETIE   | P31 |
| VIC210 | PA | IEEKFEITGTMRRRLADQS  | P31 |
| VIC210 | PA | GTMRRRLADQSLPPNFSC   | P31 |
| VIC210 | PA | QSLPPNFSCLENFRAYVD   | P31 |
| VIC210 | PA | CLENFRAYVDGFEPNGCI   | P31 |
| VIC210 | PA | CIEGKLSQMSKEVNAQIE   | P31 |
| VIC210 | PA | MSKEVNAQIEPFLKTTTPR  | P31 |
| VIC210 | PA | IEPFLKTTTPRIKLPNGPPC | P31 |
| VIC210 | PA | PRPIKLPNGPPCYQRSKF   | P32 |
| VIC210 | PA | XQDVENEEKVPRTKNMKK   | P32 |
| VIC210 | PA | KVPRTKNMKKTSKSQLKWAL | P32 |
| VIC210 | PA | KKTSKSQLKWALGENMAPEK | P32 |
| VIC210 | PA | ALGENMAPEKVDFENCRD   | P32 |

|             |    |                      |     |
|-------------|----|----------------------|-----|
| VIC210      | PA | EKVDFENCRDISDLKQYD   | P32 |
| VIC210      | PA | RDISDLKQYDSDEPELRS   | P32 |
| VIC210      | PA | YDSDEPELRSLSWQNE     | P32 |
| VIC210      | PA | RSLSSWIQNEFNKACELT   | P32 |
| VIC210      | PA | NEFNKACELTDSVWIELD   | P32 |
| VIC210      | PA | LTDSVWIELDDEIGEDVAPI | P32 |
| VIC210      | PA | WEKYCVLEIGDMLLRSI    | P32 |
| VIC210      | PA | IGDMLLRSAIGQISRPMF   | P32 |
| VIC210      | PA | AIGQISRPMFLYVRTNGT   | P32 |
| VIC210      | PA | MFLYVRTNGTSKVMMKWG   | P32 |
| VIC210      | PA | GTSKVMMKWGMEMRRCLL   | P32 |
| VIC210      | PA | SVKEKDMTKEFFENKSEA   | P32 |
| VIC210      | PA | KEFFENKSEAWPIGESPK   | P32 |
| VIC210      | PA | EAWPIGESPKGVEEGSIG   | P32 |
| VIC210      | PA | PKGVEEGSIGKVCRTLLA   | P32 |
| VIC210      | PA | GFSAESRLLLLVVQALRD   | P32 |
| VIC210      | PA | LLLLVVQALRDNLEPGTFD  | P32 |
| CA07        | PA | GPLCHQRSKFLMDALKL    | P33 |
| CA07        | PA | KFLMDALKLSIEDPSHE    | P33 |
| CA07        | PA | KLSIEDPSHEGEGIPLYD   | P33 |
| CA07        | PA | HEGEGIPLYDAIKCMKTF   | P33 |
| CA07        | PA | YDAIKCMKTFFGWKEPNI   | P33 |
| CA07        | PA | TFFGWKEPNIVKPHEKGI   | P33 |
| CA07        | PA | NIVKPHEKGINPNYLMAW   | P33 |
| CA07        | PA | GINPNYLMAWKQVLAELQ   | P33 |
| CA07        | PA | AWKQVLAELQDIENEEKI   | P33 |
| CA07/VIC210 | PA | MEDFVRQCFNPMIVELAE   | P34 |
| CA07/VIC210 | PA | FNPMIVELAEKAMKEYGE   | P34 |
| CA07/VIC210 | PA | NKFAAICTHLEVCFMYS    | P34 |
| CA07/VIC210 | PA | FLPDLYDYKENRFIEIGV   | P34 |
| CA07/VIC210 | PA | KENRFIEIGVTRREVHIY   | P34 |
| CA07/VIC210 | PA | GVTRREVHIYYLEKANKI   | P34 |
| CA07/VIC210 | PA | IHIFSFTGEEMATKADYT   | P34 |
| CA07/VIC210 | PA | EEMATKADYTLDEESRAR   | P34 |
| CA07/VIC210 | PA | YTLDEESRARIKTRLFTI   | P34 |
| CA07/VIC210 | PA | QSERGEETIEEKFEITGT   | P34 |
| CA07/VIC210 | PA | VDGFEPNGCIEGKLSQMS   | P34 |
| CA07/VIC210 | PA | LDEIGEDVAPIEHASMR    | P34 |
| CA07/VIC210 | PA | APIEHASMRRNRYFTAEV   | P34 |
| CA07/VIC210 | PA | MRRNYFTAEVSHCRATEY   | P34 |
| CA07/VIC210 | PA | EVSHCRATEYIMKGVYIN   | P34 |
| CA07/VIC210 | PA | EYIMKGVYINTALLNASC   | P34 |
| CA07/VIC210 | PA | INTALLNASCAAMDDFQL   | P34 |
| CA07/VIC210 | PA | SCAAMDDFQLIPMISKCR   | P34 |
| CA07/VIC210 | PA | QLIPMISKCRTKEGRRKT   | P34 |
| CA07/VIC210 | PA | CRTKEGRRKTNLYGFIK    | P34 |
| CA07/VIC210 | PA | KTNLYGFIKGRSHLRND    | P34 |
| CA07/VIC210 | PA | IKGRSHLRNDTDVVNFVS   | P34 |
| CA07/VIC210 | PA | NDTDVVNFVSMEFSLTDP   | P35 |
| CA07/VIC210 | PA | VSMEFSLTDPRLPHKWE    | P35 |
| CA07/VIC210 | PA | DPRLEPHKWEKYCVLEIG   | P35 |
| CA07/VIC210 | PA | WGMEMRRCLLQSLQQIES   | P35 |
| CA07/VIC210 | PA | LLQSLQQIESMIEAESSV   | P35 |
| CA07/VIC210 | PA | ESMIEAESSVKEKDMTKE   | P35 |

|             |     |                      |     |
|-------------|-----|----------------------|-----|
| CA07/VIC210 | PA  | IGKVCRTLLAKSVFNLSLY  | P35 |
| CA07/VIC210 | PA  | LAKSVFNLSLYASPQLEGF  | P35 |
| CA07/VIC210 | PA  | LYASPQLEGFSAESRKLL   | P35 |
| CA07/VIC210 | PA  | RDNLEPGTFDLGGLYEAI   | P35 |
| CA07/VIC210 | PA  | FDLGGLYEAIIEECLINDPW | P35 |
| CA07/VIC210 | PA  | AIEECLINDPWVLLNASW   | P35 |
| CA07/VIC210 | PA  | DPWVLLNASWFNSFLTHA   | P35 |
| CA07/VIC210 | PA  | WVLLNASWFNSFLTHALK   | P35 |
| CA07        | PB1 | MDVNPTLLFLKIPAQNAI   | P36 |
| CA07        | PB1 | FLKIPAQNAISTTFFPYTG  | P36 |
| CA07        | PB1 | DTVNRTHQYSEK GKWTTN  | P36 |
| CA07        | PB1 | YSEK GKWTTNTETGAPQL  | P36 |
| CA07        | PB1 | ESHPGIFENSCLETMEVV   | P36 |
| CA07        | PB1 | NSCLETMEVVQQTRVDKL   | P36 |
| CA07        | PB1 | VVQQTRVDKLTQGRQTYD   | P36 |
| CA07        | PB1 | GRLIDFLKDVMESMNKEE   | P36 |
| CA07        | PB1 | DVMESMNKEEIEITTHFQ   | P36 |
| CA07        | PB1 | EEIEITTHFQRKRRVRDN   | P36 |
| CA07        | PB1 | TQRTIGKKKQRLNKRGYL   | P36 |
| CA07        | PB1 | KQRLNKRGYLIRALTLNT   | P36 |
| CA07        | PB1 | FSMELPSFGVSGVNESAD   | P36 |
| CA07        | PB1 | GVSGVNESADMSIGVTVI   | P36 |
| CA07        | PB1 | CHRGDTQIQTRRSFELKK   | P37 |
| CA07        | PB1 | QTRRSFELKKLWDQTQSK   | P37 |
| CA07        | PB1 | KKLWDQTQSKVGLLVSDG   | P37 |
| CA07        | PB1 | SKVGLLVSDGGPNLYNIR   | P37 |
| CA07        | PB1 | IRNLHIPEVCLKWELMDD   | P37 |
| CA07        | PB1 | VCLKWELMDDDYRGRLCN   | P37 |
| CA07        | PB1 | DDDYRGRLCNPLNPFVSH   | P37 |
| CA07        | PB1 | CNPLNPFVSHKEIDSVNN   | P37 |
| CA07        | PB1 | SHKEIDSVNNAVVMPAHG   | P37 |
| CA07        | PB1 | EKFFPSSSYRRPVGISSM   | P37 |
| CA07        | PB1 | YRRPVGISSMVEAMVSRA   | P37 |
| CA07        | PB1 | SMVEAMVSRARIDARVDF   | P37 |
| CA07        | PB1 | RARIDARVDFESGRIKKE   | P37 |
| VIC210      | PB1 | MDVNPTLLFLKVPAQNAI   | P38 |
| VIC210      | PB1 | FLKVPAQNAISTTFFPYTG  | P38 |
| VIC210      | PB1 | DTVNRTHQYSER GKWTTN  | P38 |
| VIC210      | PB1 | YSER GKWTTNTETGAPQL  | P38 |
| VIC210      | PB1 | ESHPGIFENSCLETMEAV   | P38 |
| VIC210      | PB1 | NSCLETMEAVQQTRVDKL   | P38 |
| VIC210      | PB1 | AVQQTRVDKLTQGRQTYD   | P38 |
| VIC210      | PB1 | GRLIDFLKDVMESMDKEE   | P38 |
| VIC210      | PB1 | DVMESMDKEEMEITTHFQ   | P38 |
| VIC210      | PB1 | EEMEITTHFQRKRRVRDN   | P38 |
| VIC210      | PB1 | TQRTIGKKKQRVNKRGYL   | P38 |
| VIC210      | PB1 | KQRVNKRGYLIRALTLNT   | P38 |
| VIC210      | PB1 | FSMELPSFGVSGINESAD   | P38 |
| VIC210      | PB1 | GVSGINESADMSIGVTVI   | P38 |
| VIC210      | PB1 | CHRGDTQIQTRRSFEIKK   | P39 |
| VIC210      | PB1 | QTRRSFEIKKLWDQTQSR   | P39 |
| VIC210      | PB1 | KKLWDQTQSRAGLLVSDG   | P39 |
| VIC210      | PB1 | SRAGLLVSDGGPNLYNIR   | P39 |
| VIC210      | PB1 | IRNLHIPEVCLKWELMDE   | P39 |

|             |     |                     |     |
|-------------|-----|---------------------|-----|
| VIC210      | PB1 | VCLKWELMDENYRGRLCN  | P39 |
| VIC210      | PB1 | DENYRGRLCNPLNPFVSH  | P39 |
| VIC210      | PB1 | CNPLNPFVSHKEIESVNN  | P39 |
| VIC210      | PB1 | SHKEIESVNNAVVMPAHG  | P39 |
| VIC210      | PB1 | EKFFPSSSYRRPIGISSM  | P39 |
| VIC210      | PB1 | YRRPIGISSMVEAMVSRA  | P39 |
| VIC210      | PB1 | SMVEAMVSRARIDARIDF  | P39 |
| VIC210      | PB1 | RARIDARIDFESGRIKKE  | P39 |
| CA07        | PB1 | IATPGMQIRGFVYFVETL  | P40 |
| CA07        | PB1 | RGFVYFVETLARSICEKL  | P40 |
| CA07        | PB1 | TLARSICEKLEQSGLPVG  | P40 |
| CA07        | PB1 | KLEQSGLPVGGNEKKAKL  | P40 |
| CA07        | PB1 | VGGNEKKAKLANVVRKMM  | P40 |
| CA07        | PB1 | KLANVVRKMMTNSQDTEI  | P40 |
| CA07        | PB1 | MMTNSQDTEISFTITGDN  | P40 |
| CA07        | PB1 | EISFTITGDNTKWNENQN  | P40 |
| CA07        | PB1 | DNTKWNENQNPRMFLAMI  | P40 |
| CA07        | PB1 | QNPRMFLAMITYITRNQPE | P40 |
| CA07        | PB1 | MITYITRNQPEWFRNILS  | P40 |
| CA07        | PB1 | QPEWFRNILSMAPIMFSN  | P40 |
| CA07        | PB1 | LSMAPIMFSNKMARLGKG  | P40 |
| CA07        | PB1 | SNKMARLGKGYMFESKRM  | P40 |
| CA07        | PB1 | KGYMFESKRMKIRTQIPA  | P41 |
| CA07        | PB1 | RMKIRTQIPAEMLASIDL  | P41 |
| CA07        | PB1 | PAEMLASIDLKYFNESTK  | P41 |
| CA07        | PB1 | DLKYFNESTKKKIEKIRPL | P41 |
| CA07        | PB1 | TKKKIEKIRPLIDGTAS   | P41 |
| CA07        | PB1 | RPLIDGTASLSPGMMMGM  | P41 |
| CA07        | PB1 | ASLSPGMMMGMFNMLSTV  | P41 |
| CA07        | PB1 | MGMFNMLSTVLGVSILNL  | P41 |
| CA07        | PB1 | TVLGVSILNLGQKKYTKT  | P41 |
| CA07        | PB1 | NLGQKKYTKTIYWWDGLQ  | P41 |
| CA07        | PB1 | KTIYWWDGLQSSDDFALI  | P41 |
| CA07        | PB1 | LQSSDDFALIVNAPNHEG  | P41 |
| CA07        | PB1 | LIVNAPNHEGIQAGVDRF  | P41 |
| CA07        | PB1 | EGIQAGVDRFYRTCKLVG  | P41 |
| CA07/VIC210 | PB1 | AISTTFPYTGDPYSHGT   | P42 |
| CA07/VIC210 | PB1 | TGDPYSHGTGTGYTMDT   | P42 |
| CA07/VIC210 | PB1 | GTGTGYTMDTVNRTHQYS  | P42 |
| CA07/VIC210 | PB1 | TNTETGAPQLNPIDGPLPE | P42 |
| CA07/VIC210 | PB1 | QLNPIDGPLPEDNEPSGY  | P42 |
| CA07/VIC210 | PB1 | LPEDNEPSGYAQTDCVLE  | P42 |
| CA07/VIC210 | PB1 | GYAQTDCVLEAMAFLEES  | P42 |
| CA07/VIC210 | PB1 | LEAMAFLEESHPGIFENS  | P42 |
| CA07/VIC210 | PB1 | KLTQGRQTYDWTLNRNQPA | P42 |
| CA07/VIC210 | PB1 | YDWTLNRNQPAATALANT  | P42 |
| CA07/VIC210 | PB1 | QPAATALANTIEVFRSNG  | P42 |
| CA07/VIC210 | PB1 | NTIEVFRSNGLTANESGR  | P42 |
| CA07/VIC210 | PB1 | NGLTANESGRLLIDFLKDV | P42 |
| CA07/VIC210 | PB1 | FQRKRRVRDNMTKKMVTQ  | P42 |
| CA07/VIC210 | PB1 | DNMTKKMVTQRTIGKKKQ  | P42 |
| CA07/VIC210 | PB1 | YLIRALTLNTMTKDAERG  | P42 |
| CA07/VIC210 | PB1 | NTMTKDAERGKLRRAIA   | P42 |
| CA07/VIC210 | PB1 | RGKLRRAIATPGMQIRG   | P42 |

|             |     |                     |     |
|-------------|-----|---------------------|-----|
| CA07/VIC210 | PB1 | RFYRTCKLVGINMSKKKS  | P42 |
| CA07/VIC210 | PB1 | VGINMSKKKSYINKTGT   | P42 |
| CA07/VIC210 | PB1 | KSYINKTGTFFETSFFYR  | P43 |
| CA07/VIC210 | PB1 | TFFETSFFYRYGFVANFS  | P43 |
| CA07/VIC210 | PB1 | YRYGFVANFSMELPSFGV  | P43 |
| CA07/VIC210 | PB1 | ADMSIGVTVIKNNMINND  | P43 |
| CA07/VIC210 | PB1 | VIKNNMINNDLGPATAQM  | P43 |
| CA07/VIC210 | PB1 | NDLGPATAQMALQLFIKD  | P43 |
| CA07/VIC210 | PB1 | QMALQLFIKDYRYTYRCH  | P43 |
| CA07/VIC210 | PB1 | KDYRYTYRCHRGDTQIQ   | P43 |
| CA07/VIC210 | PB1 | DGGPNLYNIRNLHIPEVC  | P43 |
| CA07/VIC210 | PB1 | NNAVVMMPAHGPAKSMEYD | P43 |
| CA07/VIC210 | PB1 | HGPAKSMEYDAVATTHSW  | P43 |
| CA07/VIC210 | PB1 | YDAVATTHSWIPKRNSI   | P43 |
| CA07/VIC210 | PB1 | SWIPKRNSILNTSQRGI   | P43 |
| CA07/VIC210 | PB1 | SILNTSQRGILEDEQMYQ  | P43 |
| CA07/VIC210 | PB1 | GILEDEQMYQKCCNLFEK  | P43 |
| CA07/VIC210 | PB1 | YQKCCNLFEKFFPSSSYR  | P43 |
| CA07/VIC210 | PB1 | DFESGRIKKEEFSEIMKI  | P43 |
| CA07/VIC210 | PB1 | KEEFSEIMKICSTIEELR  | P43 |
| CA07/VIC210 | PB1 | FSEIMKICSTIEELRRQK  | P43 |
| CA07        | PB2 | MERIKELRDLMSQSRTRE  | P44 |
| CA07        | PB2 | DLMSQSRTREILTKTTVD  | P44 |
| CA07        | PB2 | KYTSGRQEKNPALRMKWM  | P44 |
| CA07        | PB2 | KNPALRMKWMAMRYPIT   | P44 |
| CA07        | PB2 | WMMAMRYPITADKRIMDM  | P44 |
| CA07        | PB2 | ITADKRIMDMIPERNEQG  | P44 |
| CA07        | PB2 | DMIPERNEQGQTLWSKTN  | P44 |
| CA07        | PB2 | QGQTLWSKTNDAGSDRVM  | P44 |
| CA07        | PB2 | TNDAGSDRVMVSPLAVTW  | P44 |
| CA07        | PB2 | VMVSPLAVTWWNRNGPTT  | P44 |
| CA07        | PB2 | TWWNRNGPTTSTVHYPKV  | P44 |
| CA07        | PB2 | TTSTVHYPKVYKTYFEKV  | P44 |
| CA07        | PB2 | KVYKTYFEKVERLKHGTF  | P44 |
| CA07        | PB2 | NQVKIRRRVDTNPGHADL  | P44 |
| CA07        | PB2 | VDTNPGHADLSAKEAQDV  | P44 |
| CA07        | PB2 | PNEVGARILTSESQLAIT  | P44 |
| CA07        | PB2 | LTSESQLAITKEKKEELQ  | P44 |
| CA07        | PB2 | ITKEKKEELQDCKIAPLM  | P44 |
| CA07        | PB2 | LQDCKIAPLMVAYMLERE  | P44 |
| CA07        | PB2 | LSPEEVSETQGTEKLIT   | P44 |
| CA07        | PB2 | TQGTEKLITITYSSSMMWE | P45 |
| CA07        | PB2 | VLVNTYQWIIRNWEIVKI  | P45 |
| CA07        | PB2 | IIRNWEIVKIQWSQDPTM  | P45 |
| CA07        | PB2 | KIQWSQDPTMLYNKMEFE  | P45 |
| CA07        | PB2 | TMLYNKMEFEPFQSLVPK  | P45 |
| CA07        | PB2 | FEPFQSLVPKATRSRYSG  | P45 |
| CA07        | PB2 | PKATRSRYSGFVRTLFQQ  | P45 |
| CA07        | PB2 | QQMRDVLGTFDTVQIIKL  | P45 |
| CA07        | PB2 | TFDTVQIIKLLPFAAAPPE | P45 |
| CA07        | PB2 | KLLPFAAAPPEQSRMQFS  | P45 |
| CA07        | PB2 | PPEQSRMQFSSLTVNVRG  | P45 |
| CA07        | PB2 | FSSLTVNVRGSGLRILVR  | P45 |
| CA07        | PB2 | RGSGLRILVRGNSPVFNY  | P45 |

|        |     |                     |     |
|--------|-----|---------------------|-----|
| CA07   | PB2 | VRGNSPVFNYNKATKRLT  | P45 |
| CA07   | PB2 | NYNKATKRLTVLGKDAGA  | P45 |
| CA07   | PB2 | LTVLGKDAGALTEDEPDEG | P45 |
| CA07   | PB2 | GALTEDEPDEGTSGVESAV | P45 |
| CA07   | PB2 | EGTSGVESAVLRGFLILG  | P45 |
| CA07   | PB2 | AVLRGFLILGKEDKRYGPA | P45 |
| CA07   | PB2 | LGKEDKRYGPALSINELS  | P45 |
| VIC210 | PB2 | MERIKELRNLMQSRTRE   | P46 |
| VIC210 | PB2 | NLMQSRTREILTKTTVD   | P46 |
| VIC210 | PB2 | KYTSGRQEKNPSLRMKWM  | P46 |
| VIC210 | PB2 | KNPSLRMKWMMAMKYPIT  | P46 |
| VIC210 | PB2 | WMMAMKYPITADKRITEM  | P46 |
| VIC210 | PB2 | ITADKRITEMVPERNEQG  | P46 |
| VIC210 | PB2 | EMVPERNEQGQTLWSKMS  | P46 |
| VIC210 | PB2 | QGQTLWSKMSDAGSDRVM  | P46 |
| VIC210 | PB2 | MSDAGSDRVMVSPLAVTW  | P46 |
| VIC210 | PB2 | VMVSPLAVTWWNRNGPVT  | P46 |
| VIC210 | PB2 | TWWNRNGPVTSTVHYPKV  | P46 |
| VIC210 | PB2 | VTSTVHYPKVYKTYFDKV  | P46 |
| VIC210 | PB2 | KVYKTYFDKVERLKHGTF  | P46 |
| VIC210 | PB2 | NQVKIRRRVDINPGHADL  | P46 |
| VIC210 | PB2 | VDINPGHADLSAKEAQDV  | P46 |
| VIC210 | PB2 | PNEVGARILTSESQLTIT  | P46 |
| VIC210 | PB2 | LTSESQLTITKEKKEELR  | P46 |
| VIC210 | PB2 | ITKEKKEELRDCKISPLM  | P46 |
| VIC210 | PB2 | LRDCKISPLMVAYMLERE  | P46 |
| VIC210 | PB2 | LSPEEVSETQGTERLTIT  | P46 |
| VIC210 | PB2 | TQGTERLTITYSSSMMWE  | P47 |
| VIC210 | PB2 | VLVNTYQWIIRNWEAVKI  | P47 |
| VIC210 | PB2 | IIRNWEAVKIQWSQNPAM  | P47 |
| VIC210 | PB2 | KIQWSQNPAMLYNKMEFE  | P47 |
| VIC210 | PB2 | AMLYNKMEFEPFQSLVPK  | P47 |
| VIC210 | PB2 | FEPFQSLVPKAIRSQYSG  | P47 |
| VIC210 | PB2 | PKAIRSQYSGFVRTLFQQ  | P47 |
| VIC210 | PB2 | QQMRDVLGTFDTTQIIKL  | P47 |
| VIC210 | PB2 | TFDTTQIIKLLPFAAAPPK | P47 |
| VIC210 | PB2 | KLLPFAAAPPKQSRMQFS  | P47 |
| VIC210 | PB2 | PPKQSRMQFSSLTVNVRG  | P47 |
| VIC210 | PB2 | FSSLTVNVRGSGMRILVR  | P47 |
| VIC210 | PB2 | RGSGMRILVRGNSPVFNY  | P47 |
| VIC210 | PB2 | VRGNSPVFNYNKTTKRLT  | P47 |
| VIC210 | PB2 | NYNKTTKRLTILGKDAGT  | P47 |
| VIC210 | PB2 | LILGKDAGTLIEDPDES   | P47 |
| VIC210 | PB2 | GTLIEDPDESTSGVESAV  | P47 |
| VIC210 | PB2 | ESTSGVESAVLRGFLIIG  | P47 |
| VIC210 | PB2 | AVLRGFLIIGKEDRRYGPA | P47 |
| VIC210 | PB2 | IGKEDRRYGPAALSINELS | P47 |
| CA07   | PB2 | RELVRKTRFLPVAGGTGS  | P48 |
| CA07   | PB2 | FLPVAGGTGSVYIEVLHL  | P48 |
| CA07   | PB2 | GSVYIEVLHLTQGTCWEQ  | P48 |
| CA07   | PB2 | HLTQGTCWEQMYTPGGEV  | P48 |
| CA07   | PB2 | EQMYTPGGEVRNDDVDQS  | P48 |
| CA07   | PB2 | EVRNDDVDQSLIIAARNI  | P48 |
| CA07   | PB2 | QSLIIAARNIVRRAAVSA  | P48 |

|             |     |                      |     |
|-------------|-----|----------------------|-----|
| CA07        | PB2 | NIVRRAAVSADPLASLLE   | P48 |
| CA07        | PB2 | SADPLASLLEMCHSTQIG   | P48 |
| CA07        | PB2 | LEMCHSTQIGGVRMVDIL   | P48 |
| CA07        | PB2 | IGGVRMVDILRQNPTEEQ   | P48 |
| CA07        | PB2 | ILRQNPTEEQAVDICKAA   | P48 |
| CA07        | PB2 | EQAVDICKAAIGLRISSS   | P48 |
| CA07        | PB2 | AAIGLRISSSFSFGGFTF   | P48 |
| CA07        | PB2 | SSFSFGGFTFKRTSGSSV   | P48 |
| CA07        | PB2 | TFKRTSGSSVKKEEVLT    | P48 |
| CA07        | PB2 | SVKKEEVLTGNLQTLKI    | P48 |
| CA07        | PB2 | LTGNLQTLKIRVHEGYEE   | P48 |
| CA07        | PB2 | KIRVHEGYEFTMVGRRA    | P48 |
| CA07        | PB2 | EEFTMVGRRATAILRKAT   | P48 |
| CA07        | PB2 | RATAILRKATRRLIQLIV   | P49 |
| CA07        | PB2 | ATTRLIQLIVSGRDEQSI   | P49 |
| CA07        | PB2 | IVSGRDEQSI AEAIIVAM  | P49 |
| CA07        | PB2 | SIAEAIIVAMVFSQEDCM   | P49 |
| CA07        | PB2 | AMVFSQEDCMIKAVRGDL   | P49 |
| CA07        | PB2 | CMIKAVRGDLNFVNRANQ   | P49 |
| CA07        | PB2 | DLNFVNRANQRLNPMHQL   | P49 |
| CA07        | PB2 | NQRLNPMHQLLRHFQKDA   | P49 |
| CA07        | PB2 | QLLRHFQKDAKVLVFNWG   | P49 |
| CA07        | PB2 | DAKVLVFNWGI SIDNVM   | P49 |
| CA07        | PB2 | WGIESIDNVMGMIGILPD   | P49 |
| CA07        | PB2 | VMGMIGILPDMPSTEMS    | P49 |
| CA07        | PB2 | PDMPSTEMSLRGIRVSK    | P49 |
| CA07        | PB2 | MSLRGIRVSKMGVDEYSS   | P49 |
| CA07        | PB2 | SKMGVDEYSSTERVVVSI   | P49 |
| CA07        | PB2 | SSTERVVVSI DRFLRVRD  | P49 |
| CA07/VIC210 | PB2 | REILTKTTVDHMAIIKKY   | P50 |
| CA07/VIC210 | PB2 | VDHMAIIKKYTSGRQEKN   | P50 |
| CA07/VIC210 | PB2 | KVERLKHGTFGPVHFRNQ   | P50 |
| CA07/VIC210 | PB2 | TFGPVHFRNQVKIRRRVD   | P50 |
| CA07/VIC210 | PB2 | DLSAKEAQDVIMEVFFPN   | P50 |
| CA07/VIC210 | PB2 | DVIMEVFFPNEVGARILT   | P50 |
| CA07/VIC210 | PB2 | LMVAYMLERELVRKTRFL   | P50 |
| CA07/VIC210 | PB2 | SIDRFLRVRDQRGNVLLS   | P50 |
| CA07/VIC210 | PB2 | RDQRGNVLLSPEEVSETQ   | P50 |
| CA07/VIC210 | PB2 | ITYSSSMMWEINGPESVL   | P50 |
| CA07/VIC210 | PB2 | WEINGPESVLVNTYQWII   | P50 |
| CA07/VIC210 | PB2 | SGFVRTLFQQMRDVLGTF   | P50 |
| CA07/VIC210 | PB2 | GPALSINELSNLAKGEKA   | P50 |
| CA07/VIC210 | PB2 | LSNLAKGEKANVLIGQGD   | P50 |
| CA07/VIC210 | PB2 | KANVLIGQGDVVLV MKRK  | P50 |
| CA07/VIC210 | PB2 | GDVVLV MKRKR DSSILTD | P50 |
| CA07/VIC210 | PB2 | RKR DSSILTDSQTATKRI  | P50 |
| CA07/VIC210 | PB2 | SILTDSQTATKRIRMAIN   | P50 |

**Figure. S3. Influenza peptide pools.** Peptides were derived from the proteome of the H1N1pdm09 strain, A/California/07/2009 (CA), or the seasonal A/Perth/16/2009-like H3N2 strain, A/Victoria/210/2009 (Vic). Peptide sequences were composed of 18 amino acids with a 10 amino acid overlap with each subsequent peptide, spanning the entire length of each viral protein. Individual peptides from each viral strain were combined into peptide pools for each protein based on the region of the protein from which the peptide was derived. Homologous peptide sequences between the two strains were combined into their own peptide pools for each viral protein. Regions of each protein which compose each of the 50 peptide pools (P) are depicted. Blue, red, and purple regions represent unique sequences for each viral strain. Tan and green regions represent portions of each protein in which both viruses share 100% homology. The regions depicted in a horizontal line represent portions of the A/Victoria/210/2009 proteome for which no amino acid sequence was available.

A

## Shared epitopes

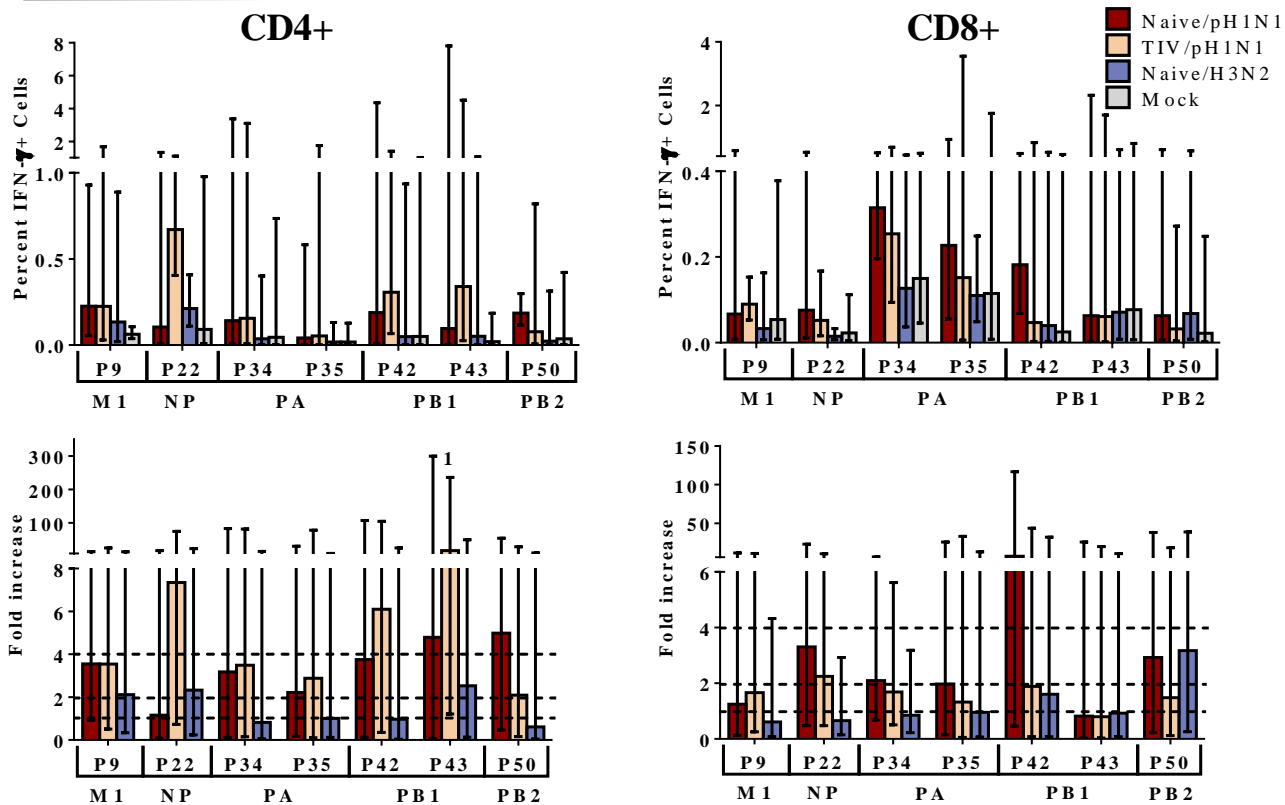



**B****A/California/07 (H1N1)**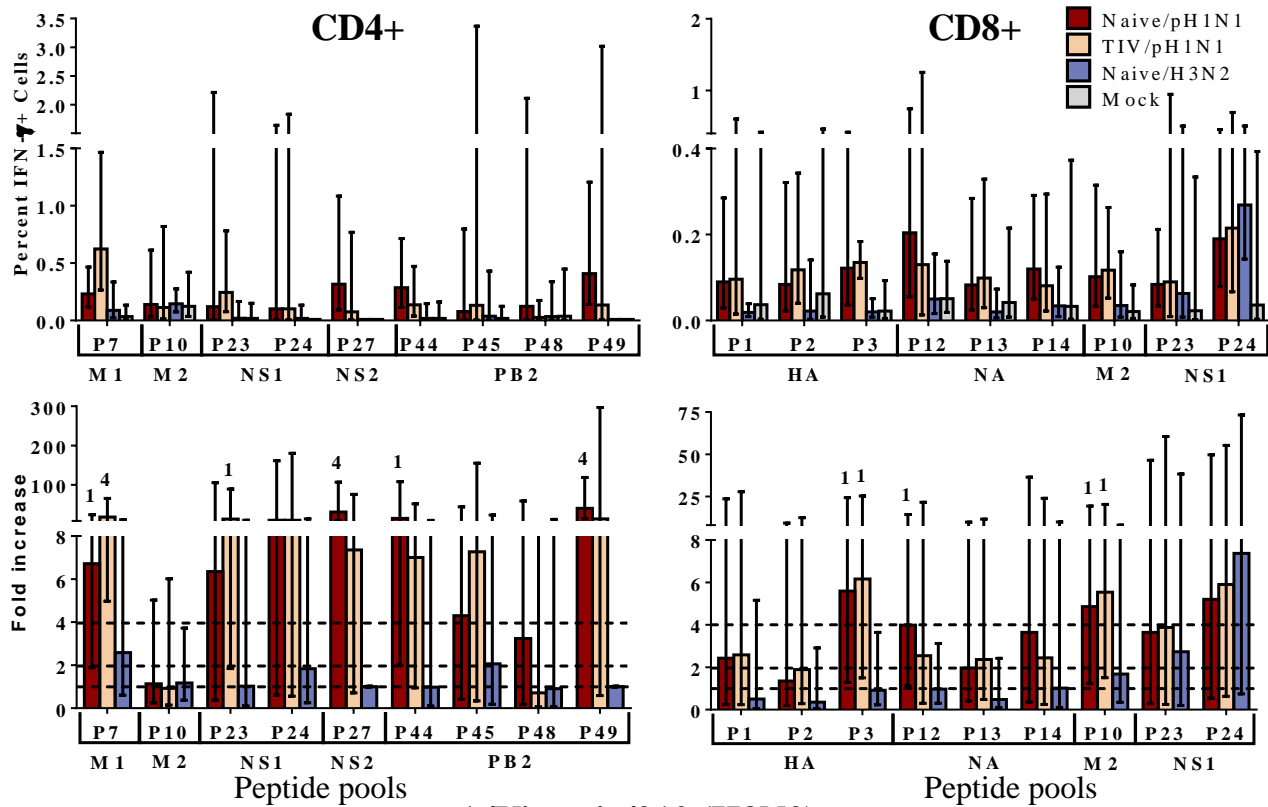**A/Victoria/210 (H3N2)**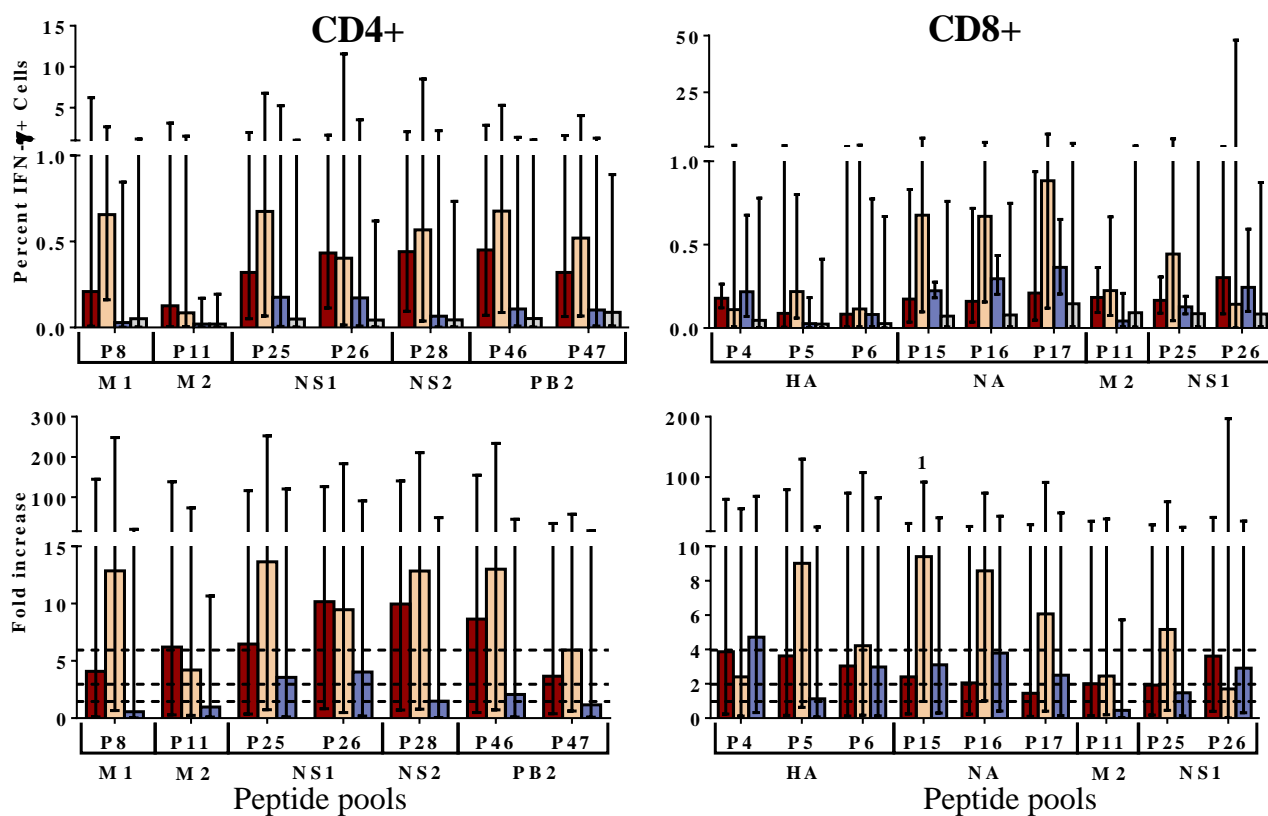

**Figure. S4. T cell responses to additional influenza peptide pools.** Splenocytes were collected from naïve ferrets infected intranasally with A/NY/21/2009 (Naïve/H1N1pdm09, n=4), A/Perth/16/2009 (Naïve/H3N2, n=4), or mock infected ferrets (Naïve/Mock, n=4) 14d post infection. Splenocytes were also collected from ferrets vaccinated with commercial 2011-2012 TIV, challenged with A/NY/21/2009 (TIV/H1N1pdm09, n=4). Splenocytes were stimulated with peptide pools (p) derived from regions of each influenza protein from A/California/07/2009 (H1N1pdm09; A) or the A/Perth/16/2009-like seasonal H3N2 strain, A/Victoria/210/2009 (B). T cells producing IFN- $\gamma$  in response to peptide stimulation were assessed by flow cytometry. The percent IFN- $\gamma$ + cells and fold-increase over mock infected animals are depicted. Responses to peptide sequences sharing 100% homology between both viruses were determined (A). Peptide pools to which lower percentages of CD4+ and CD8+ T cells responded are also represented. Responses significantly <sup>1</sup>greater ( $p < 0.05$ ) than Mock infected ferrets were considered modest responses, <sup>2</sup>2-fold greater were considered moderate, and <sup>4</sup>4-fold greater were considered substantial. Dotted lines indicate 1-, 2-, and 4-fold increases over mock infected controls. Error bars represent SEM.

# CD4 IFN- $\gamma$ + Cells – All peptides

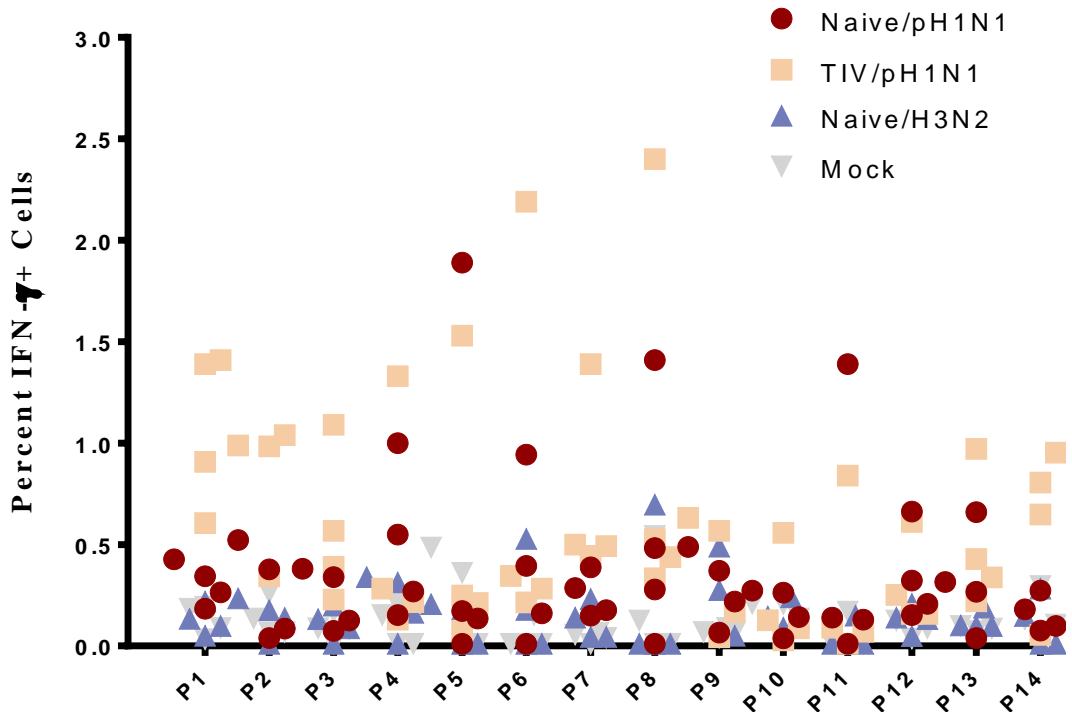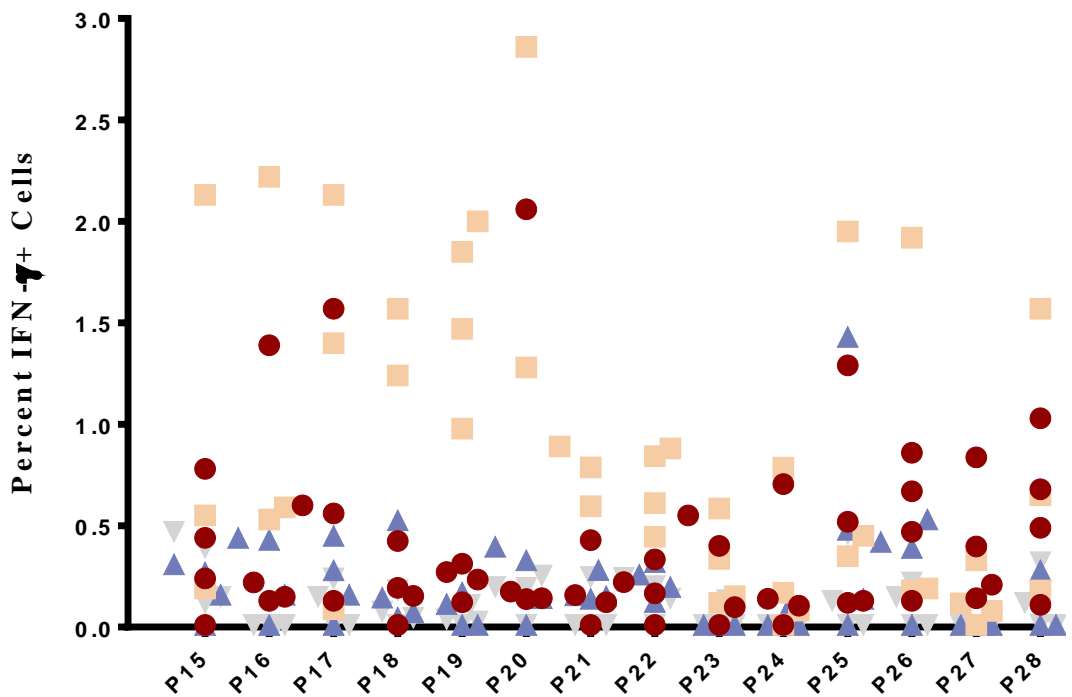

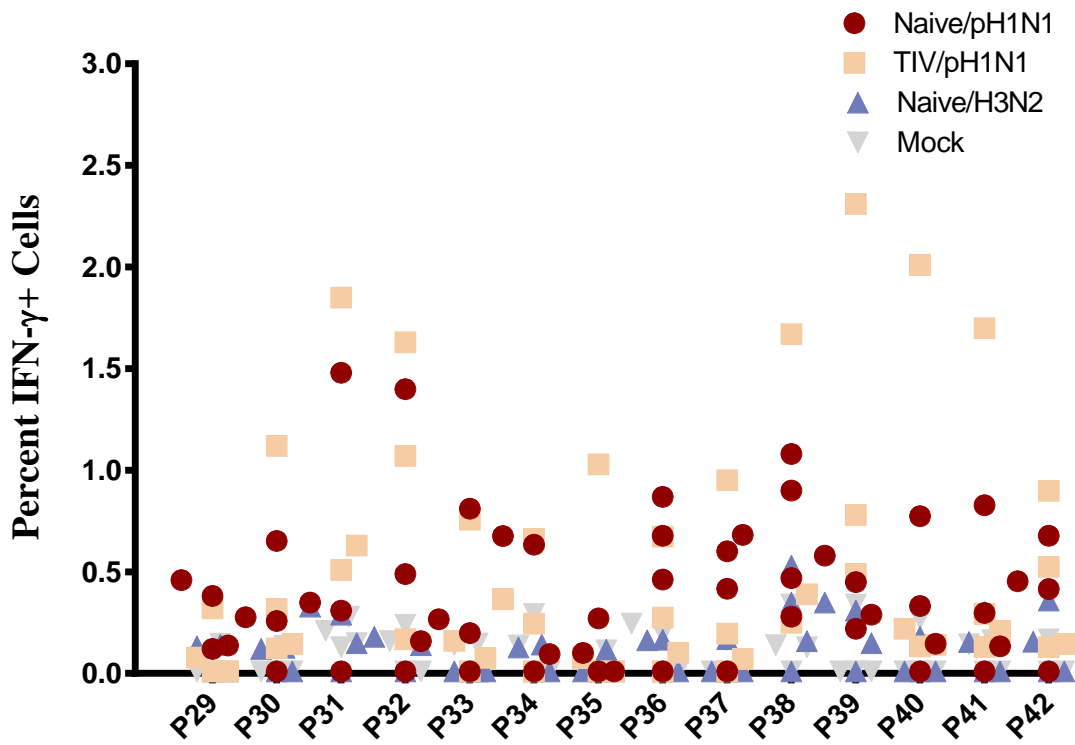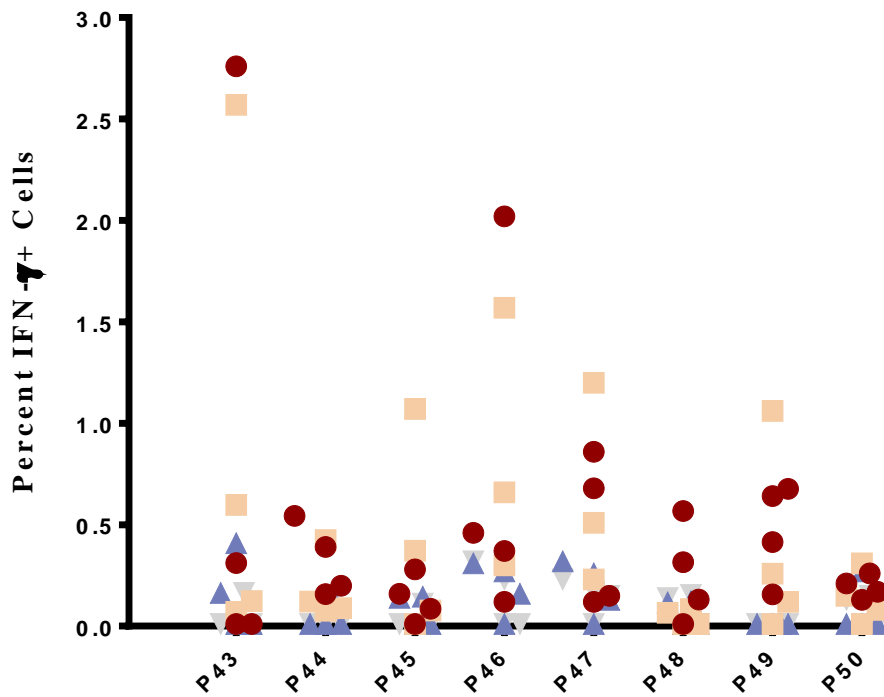

**Figure. S5. Individual ferret CD4+ T cell responses to influenza peptide pools.**

Splenocytes collected were collected from naïve ferrets infected with A/NY/21/2009 (Naïve/H1N1pdm09), A/Perth/16/2009 (Naïve/H3N2), or mock infected (Naïve/Mock) 14d post-infection. Splenocytes were also collected from ferrets vaccinated with commercial 2011-2012 TIV, challenged with A/NY/21/2009 (TIV/H1N1pdm09). Splenocytes were stimulated with peptide pools (p) derived from influenza proteins of A/California/07/2009 and A/Victoria/210/2009. The frequency of CD4+ T cells producing IFN- $\gamma$  in response to peptide stimulation were assessed by flow cytometry.

# CD8 IFN- $\gamma$ + Cells – All peptides

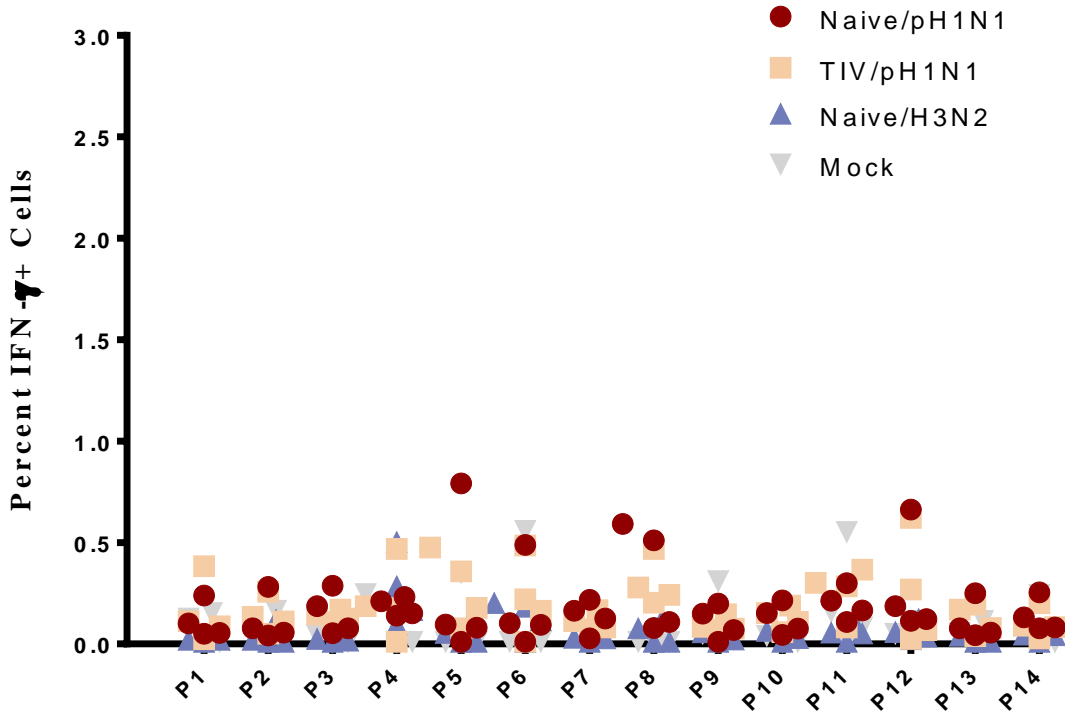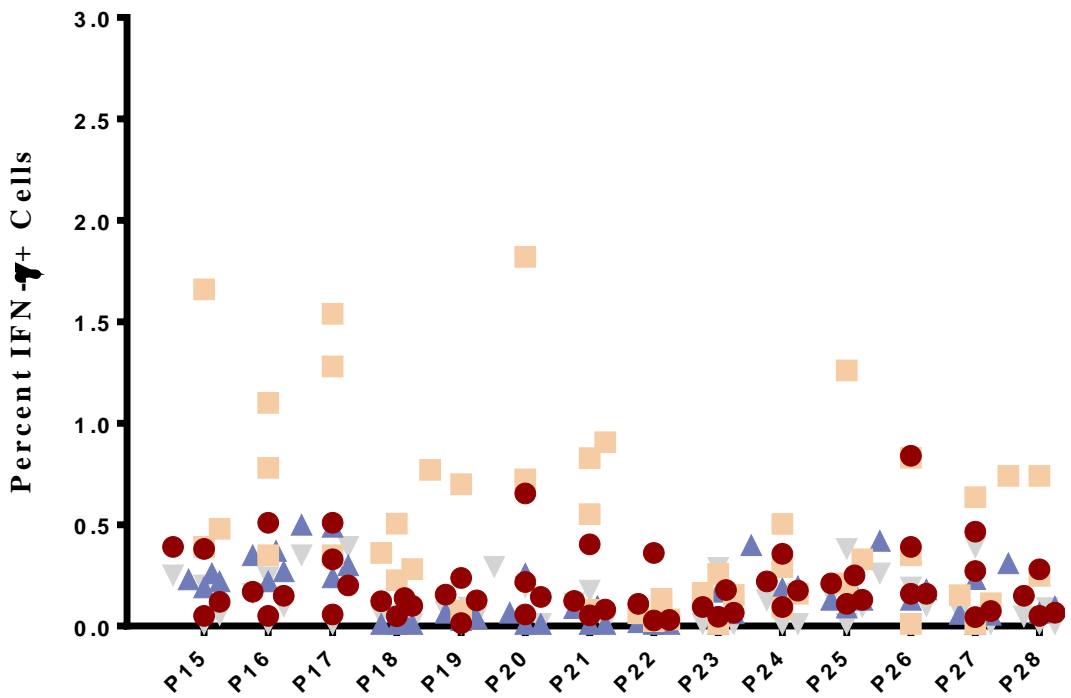

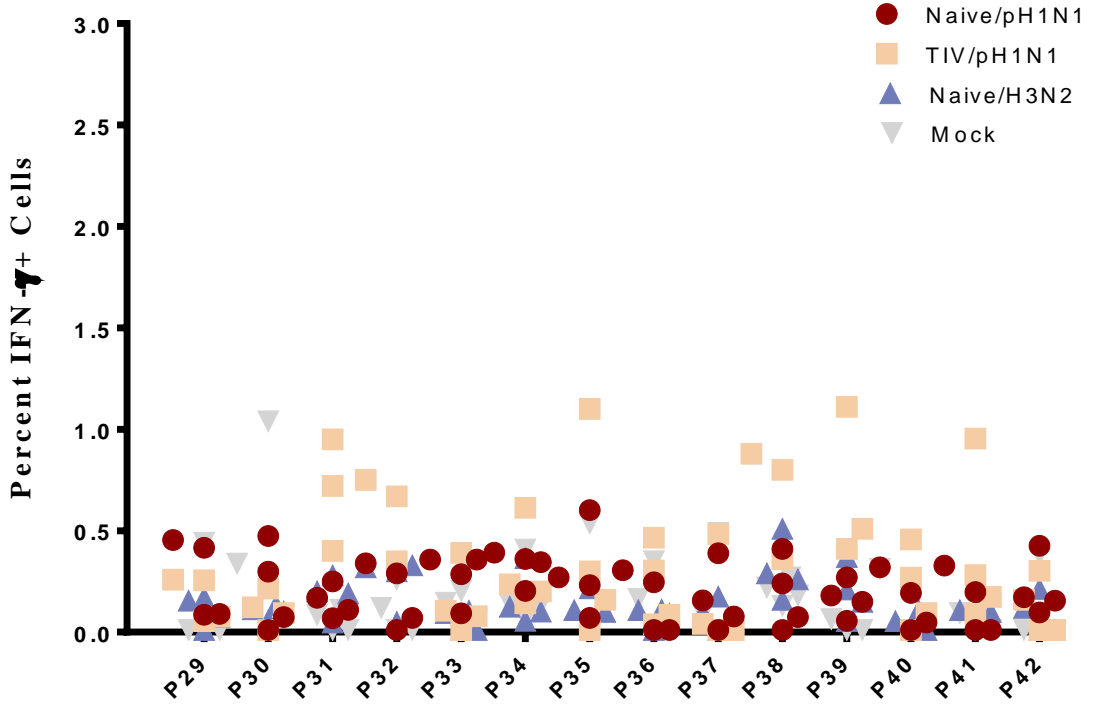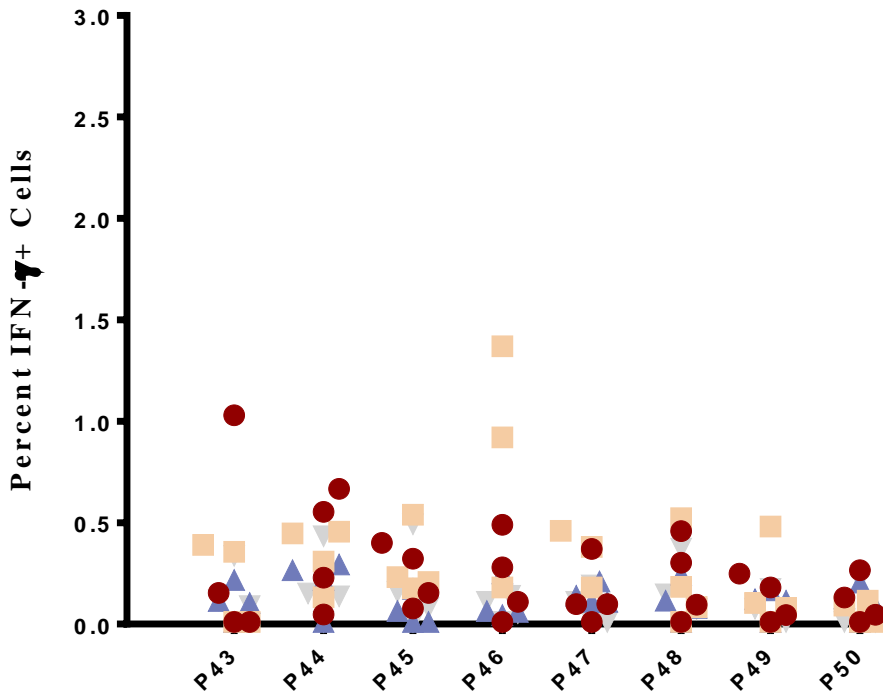

**Figure. S6. Individual ferret CD8+ T cell responses to influenza peptide pools.**

Splenocytes collected were collected from naïve ferrets infected with A/NY/21/2009 (Naïve/H1N1pdm09), A/Perth/16/2009 (Naïve/H3N2), or mock infected (Naïve/Mock) 14d post-infection. Splenocytes were also collected from ferrets vaccinated with commercial 2011-2012 TIV, challenged with A/NY/21/2009 (TIV/H1N1pdm09). Splenocytes were stimulated with peptide pools (p) derived from influenza proteins of A/California/07/2009 and A/Victoria/210/2009. The frequency of CD8+ T cells producing IFN- $\gamma$  in response to peptide stimulation were assessed by flow cytometry.



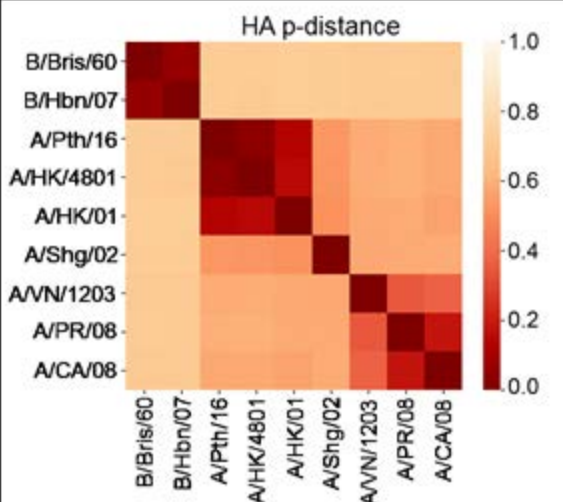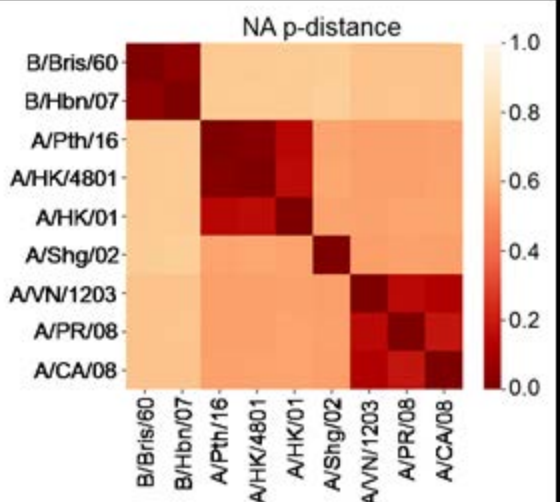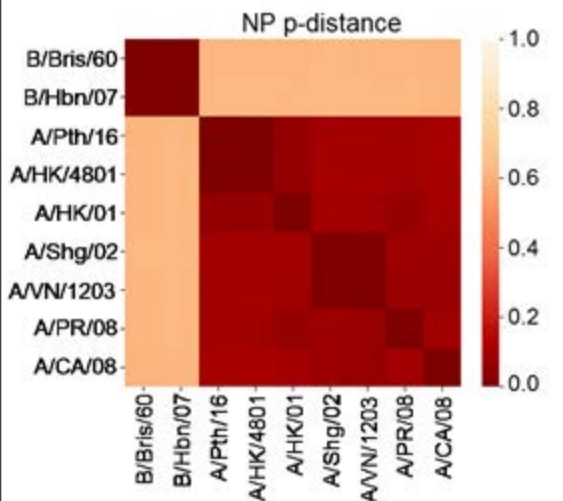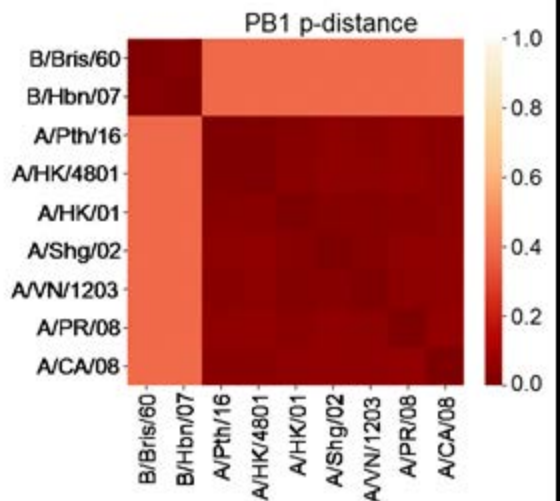

**Figure. S7. Assessment of protein homology of viral proteins dominating the influenza response.** Amino acid homology of the viral proteins which tended to dominate the responses to the influenza peptide pools were analyzed against a selection of contemporary and historical influenza strains, constructing p-distance heat maps to determine protein conservation.
